# Supplementary material for: New polymers based on thieno[3,2-b]pyrrole derivatives and their electrochemical properties
Source: Royal Society of Chemistry journal article supplement (doi:10.1039/d3py00893b), 2023-01-01
Supplement: d3py00893b1.pdf [file d3py00893b1.pdf]

Supporting Information for:

## **New polymers based on thieno[3,2-b]pyrrole derivatives and their electrochemical properties**

Mansur S. Miftakhov <sup>\*a</sup>, Seda A. Torosyan <sup>a</sup>, Fanuza A. Gimalova<sup>\*a</sup>, Sergey L. Khursan <sup>a</sup>, Zoya F. Nuriakhmetova <sup>a</sup>, Elena V. Shchurik <sup>b</sup>, Olga. A. Kraevaya <sup>b</sup>, Aleksandr F. Shestakov <sup>b,c</sup>, Pavel A. Troshin <sup>d,b</sup>

*a. Ufa Institute of Chemistry, Ufa Federal Research Centre of the Russian Academy of Sciences, Oktyabrya pr., 69, 450054 Ufa, Russian Federation; e-mail: [tsynth@anrb.ru](mailto:tsynth@anrb.ru).*

*b. Federal Research Center of Problems of Chemical Physics and Medicinal Chemistry of the Russian Academy of Sciences, 1 Prospekt Akademika Semenova, 142432 Chernogolovka, Russian Federation*

*c. Department of Fundamental Physics & Chemical Engineering, M.V. Lomonosov Moscow State University, GSP 1, 1-51 Leninskie Gory, 119991 Moscow, Russian Federation*

*d. Zhengzhou Research Institute, Harbin Institute of Technology, Longyuan East 7th 26, Jinshui District, 450003 Zhengzhou, Henan Province, China*

### **\*Corresponding authors.**

E-mail: [tsynth@anrb.ru](mailto:tsynth@anrb.ru) (Mansur S. Miftakhov), [fanuza\\_gimalova@mail.ru](mailto:fanuza_gimalova@mail.ru) (Fanuza A. Gimalova)

## Table of Content

|                                                                                                                                 |   |
|---------------------------------------------------------------------------------------------------------------------------------|---|
| Experimental section .....                                                                                                      | 3 |
| Bromination reactions .....                                                                                                     | 3 |
| a) Bromination of ester <b>3a</b> with NBS .....                                                                                | 3 |
| b) Bromination of ester <b>3b</b> by the action of a bromo–dioxane complex .....                                                | 4 |
| c) Bromination of <b>3b</b> with bromine .....                                                                                  | 5 |
| d) Bromination of bis-thieno[3,2- <i>b</i> ]pyrroles and thieno[3,2- <i>b</i> ]pyrrolopyrroles with bromo-dioxane complex ..... | 5 |
| e) Synthesis of 4-benzyl- <i>N,N</i> -diethyl-4 <i>H</i> -thieno[3,2- <i>b</i> ]pyrrole-5-carboxamide .....                     | 6 |
| f) Synthesis of <i>N</i> -[(4-benzyl-4 <i>H</i> -thieno[3,2- <i>b</i> ]pyrrol-5-yl)methyl]- <i>N,N</i> -diethylamine .....      | 6 |
| g) Dedoping of polymers with hydrazine hydrate .....                                                                            | 7 |
| References .....                                                                                                                | 8 |
| Figures ( <sup>1</sup> H and <sup>13</sup> C NMR spectra and mass-spectra) .....                                                | 9 |

## Experimental section

### Bromination reactions

**a) Bromination of ester 3a with NBS.** NBS (0.15 g, 0.82 mmol) was added in small portions to a chloroform solution of **3a** (0.16 g, 0.82 mmol in 6 mL), then AcOH (2 mL) was added dropwise. The reaction mixture was stirred at room temperature until the initial compound disappeared (TLC control, ~5 days). Then NaHCO<sub>3</sub> was added, the reaction products were extracted with CHCl<sub>3</sub> (3×6 mL). The combined organic layers were washed with saturated NaHCO<sub>3</sub> solution, dried over MgSO<sub>4</sub>, then the solvent was evaporated. The products were isolated by column chromatography on a SiO<sub>2</sub> column (eluent - petroleum ether : ethyl acetate, 7:1). We obtained 0.16 g (73%) of bromide **4** and 40 mg (18%) of bromide **5**. Similar amounts were yielded upon bromination by Br<sub>2</sub>-dioxane complex (71% and 18% for **4** and **5**, respectively).

**Methyl 2-bromo-4-methyl-4H-thieno[3,2-b]pyrrole-5-carboxylate (4).** Light yellow crystals, m.p. 109-111°C. IR (film)  $\nu$ , cm<sup>-1</sup>: 3121, 2949, 1705, 1539, 1462, 1398, 1389, 1364, 1236, 1165, 1092, 968, 922, 822, 795, 758, 480. <sup>1</sup>HNMR (CDCl<sub>3</sub>,  $\delta$ , ppm, J/Hz): 3.92 s (3H, NCH<sub>3</sub>), 4.02 s (3H, OCH<sub>3</sub>), 7.00 s (1H, H-3), 7.06 s (1H, H-2). <sup>13</sup>CNMR (CDCl<sub>3</sub>,  $\delta$ , ppm): 34.62 (NCH<sub>3</sub>), 51.37 (OCH<sub>3</sub>), 108.58 (C-6), 113.51 (C-3), 116.05 (C-2), 121.95 (C-6a), 125.73 (C-5), 143.39 (C-3a), 162.07 (C=O<sub>2</sub>Me). *m/z* (EI, %): 274 [MH]<sup>+</sup> (50).

**Methyl 6-bromo-4-methyl-4H-thieno[3,2-b]pyrrole-5-carboxylate (5).** Light yellow crystals, m.p. 89-91°C. IR (film)  $\nu$ , cm<sup>-1</sup>: 3104, 2949, 1701, 1541, 1489, 1454, 1391, 1366, 1252, 1167, 1113, 1053, 968, 789, 766, 723, 694. <sup>1</sup>HNMR (CDCl<sub>3</sub>,  $\delta$ , ppm, J/Hz): 3.92 s (3H, NCH<sub>3</sub>), 4.02 s (3H, OCH<sub>3</sub>), 6.95 d (1H, *J* = 5.4, H-3), 7.35 d (1H, *J* = 5.3, H-2). <sup>13</sup>CNMR (CDCl<sub>3</sub>,  $\delta$ , ppm): 36.04 (NCH<sub>3</sub>), 51.46 (OCH<sub>3</sub>), 96.21 (C-6), 110.60 (C-3), 123.94 (C-6a), 125.09 (C-5), 129.42 (C-2), 143.66 (C-3a), 161.50 (C=O<sub>2</sub>Me). *m/z* (EI, %): 274 (275) [MH]<sup>+</sup> (100), 195 [MH-Br]<sup>+</sup> (26).

**b) Bromination of ester 3b by the action of a bromo-dioxane complex.** Br<sub>2</sub>-dioxane complex (0.19 g, 0.775 mmol) was added to a dioxane solution of compound **3b** (0.21 g, 0.775 mmol in 10 mL). The reaction mixture was stirred at room temperature until the starting ester was disappeared (TLC monitoring, ~24 h). The reaction products were extracted with CHCl<sub>3</sub> (3×10 mL). The combined organic layers were washed with saturated NaHCO<sub>3</sub> solution, dried over MgSO<sub>4</sub>, then the solvent was evaporated. The products were isolated by chromatography on a SiO<sub>2</sub> column (eluent - petroleum ether:ethyl acetate, 5:1). We have received 0.22 g (73%) of bromide **6** and 16 mg (6%) of bromide **7**.

**Methyl-4-benzyl-2-bromo-4H-thieno[3,2-b]pyrrole-5-carboxylate (6).** Light yellow crystals, m.p. 105-107°C. IR (film)  $\nu$ , cm<sup>-1</sup>: 3122, 3109, 3088, 2924, 1604, 1676, 1533, 1454, 1430, 1416, 1355, 1322, 1289, 1177, 1159, 1045, 958, 843, 826, 784, 757, 717, 691, 670. <sup>1</sup>HNMR (CDCl<sub>3</sub>,  $\delta$ , ppm, J/Hz):

3.83 s (3H, CH<sub>3</sub>), 5.71 s (2H, CH<sub>2</sub>Ph), 6.91 s (1H, H-3), 7.11 d (2H, *J* = 7.0, Ph), 7.15 s (1H, H-6), 7.24-7.28 m (3H, Ph). <sup>13</sup>CNMR (CDCl<sub>3</sub>, δ, ppm): 50.46 (NCH<sub>2</sub>), 51.45 (OCH<sub>3</sub>), 109.56 (C-6), 113.97 (C-3), 116.45 (C-2), 122.65 (C-6a), 125.40 (C-5), 126.66 (C-Ar), 127.58 (C-Ar), 128.73 (C-Ar), 137.52 (C-Ar), 143.19 (C-3a), 161.85 (C=O<sub>2</sub>Me). *m/z* (EI, %): 350 [MH]<sup>+</sup> (45), 155 (100%).

**Methyl-4-benzyl-6-bromo-4*H*-thieno[3,2-*b*]pyrrole-5-carboxylate (7).** Yellow oily substance. IR (film)  $\nu$ , cm<sup>-1</sup>: 3122, 3109, 3088, 2924, 1604, 1676, 1533, 1454, 1430, 1416, 1355, 1322, 1289, 1177, 1159, 1045, 958, 843, 826, 784, 757, 717, 691, 670. <sup>1</sup>HNMR (CDCl<sub>3</sub>, δ, ppm, *J*Hz): 3.87 s (3H, OCH<sub>3</sub>), 5.72 s (2H, CH<sub>2</sub>Ph), 6.89 d (1H, *J* = 5.3, H-3), 7.09 d (2H, *J* = 7.7, Ph), 7.26-7.33 m (4H, Ph, H-2). <sup>13</sup>CNMR (CDCl<sub>3</sub>, δ, ppm): 51.44 (NCH<sub>2</sub>), 51.21 (OCH<sub>3</sub>), 97.21 (C-6), 113.13 (C-3), 121.50 (C-6a), 123.91 (C-5), 126.69 (C-Ar), 127.43 (C-Ar), 128.65 (C-Ar), 129.80 (C-2), 137.94 (C-Ar), 142.11 (C-3a), 161.27 (C=O<sub>2</sub>Me). *m/z* (EI, %): 350 [MH]<sup>+</sup> (45), 155 (100%).

**c) Bromination of 3a with bromine.** Bromine (0.65 g, 4.1 mmol) in 20 mL of CH<sub>2</sub>Cl<sub>2</sub> was added dropwise to a CH<sub>2</sub>Cl<sub>2</sub> solution of ester **3a** (0.16 g, 0.82 mmol in 30 mL). The reaction mixture was stirred until the starting compound disappeared (TLC control), then the solvent was evaporated. The mixture of di- and tribromides **8**, **9** was separated by column chromatography on a SiO<sub>2</sub> column (eluent - petroleum ether:ethyl acetate, 5:1).

**Methyl-2,6-dibromo-4-methyl-4*H*-thieno[3,2-*b*]pyrrole-5-carboxylate (8).** Yield 0.26 g (90%). Colorless crystals, m.p. 146-148 °C. IR (film)  $\nu$ , cm<sup>-1</sup>: 1692, 1450, 1391, 1364, 1246, 1157, 1115, 1053, 935, 826, 766, 721. <sup>1</sup>HNMR (CDCl<sub>3</sub>, δ, ppm, *J*Hz): 3.92 s (3H, NCH<sub>3</sub>), 3.97 s (3H, OCH<sub>3</sub>), 7.01 s (1H, H-3). <sup>13</sup>CNMR (CDCl<sub>3</sub>, δ, ppm): 36.15 (NCH<sub>3</sub>), 51.57 (OCH<sub>3</sub>), 95.79 (C-6), 114.08 (C-3), 116.81 (C-2), 123.33 (C-6a), 125.17 (C-5), 141.69 (C-3a), 161.48 (C=O<sub>2</sub>Me). *m/z* (EI, %): 354 [MH]<sup>+</sup> (100).

**Methyl-2,3,6-tribromo-4-methyl-4*H*-thieno[3,2-*b*]pyrrole-5-carboxylate (9).** Yield 20 mg (7%). Colorless crystals, m.p. 139-141 °C. IR (film)  $\nu$ , cm<sup>-1</sup>: 1703, 1533, 1441, 1402, 1377, 1358, 1229, 1186, 1119, 1109, 1063, 978, 964, 803, 841, 768, 733. <sup>1</sup>HNMR (CDCl<sub>3</sub>, δ, ppm, *J*Hz): 3.92 s (3H, NCH<sub>3</sub>), 4.25 s (3H, OCH<sub>3</sub>). <sup>13</sup>CNMR (CDCl<sub>3</sub>, δ, ppm): 34.04 (NCH<sub>3</sub>), 51.76 (OCH<sub>3</sub>), 95.05 (C-3), 95.85 (C-6), 115.59 (C-2), 124.90 (C-6a, C-5), 136.52 (C-3a), 161.11 (C=O<sub>2</sub>Me). *m/z* (EI, %): 432 (434) [MH]<sup>+</sup> (100).

**d) Bromination of bis-thieno[3,2-*b*]pyrroles and thieno[3,2-*b*]pyrrolopyrroles with bromo-dioxane complex**

**Bromination of 1b with bromo-dioxane complex.** Br<sub>2</sub>-dioxane complex (0.23 g, 0.92 mmol) was added to a solution of **1b** (0.27 g, 0.92 mmol) in 50 mL of anhydrous CH<sub>2</sub>Cl<sub>2</sub>. The reaction mixture was stirred at room temperature until the starting compound was consumed (TLC monitoring, ~24 h).

The resulting dark blue precipitate was filtered off, washed with solvents (petroleum ether, EtOAc, CHCl<sub>3</sub>, CH<sub>2</sub>Cl<sub>2</sub>), the precipitate was dried in air, and 0.250 g of insoluble polymer was obtained. IR (oil)  $\nu$ , cm<sup>-1</sup>: 3600-3800 (unpermitted), 1701 w, 1995 w, 1458 s, 1377 m, 1074 w, 968 w, 720 w. Found, %: C 58.34, H 3.77, Br 19.82, N 7.35, S 8.07. Calculated, %: C 58.23, H 4.07, Br 21.52, N 7.54, S 8.64.

**Bromination of 2b with bromo-dioxane complex.** The reaction proceeds similarly to **1b** bromination with the formation of a dark blue polymer precipitate. IR (oil)  $\nu$ , cm<sup>-1</sup>: 3600-3800 (unpermitted), 2800 s, 1600 s, 1458 s, 1377 m, 1147-1124 m, 721 w. Found, %: C 62.17, H 3.91, Br 13.23, N 5.70, S 10.80. Calculated, %: C 62.66, H 4.09, Br 15.44, N 5.41, S 12.39.

**Bromination of 1a by the action of a bromo-dioxane complex.** The reaction proceeds similarly to **1b** bromination with the formation of a dark blue polymer precipitate. IR (oil)  $\nu$ , cm<sup>-1</sup>: 3600-3800 (unpermitted), 2800-3000 s, 1714 w, 1581 m, 1456 s, 1377 m, 1298 m, 1215 m, 1074 m, 960 w, 783 w, 721 w. Found, %: C 47.33, H 3.13, Br 25.93, N 8.99, S 9.97. Calculated, %: C 48.82, H 3.76, Br 27.07, N 9.49, S 10.86.

**Bromination of 2a with bromo-dioxane complex.** The reaction proceeds similarly to **1b** bromination with the formation of a dark blue polymer precipitate. IR (oil)  $\nu$ , cm<sup>-1</sup>: 3600-3800 (unpermitted), 2800-3000 s, 1655 w, 1604 m, 1522 m, 1456 s, 1377 s, 1289 m, 1261 m, 1152 m, 1084 w, 1020 w, 797 w, 721 m. Found, %: C 49.25, H 3.08, Br 16.81, N 7.45, S 16.06. Calculated, %: C 49.32, H 3.59, Br 21.87, N 7.67, S 17.56.

**Bromination of 2c with bromo-dioxane complex.** The reaction proceeds similarly to **1b** bromination with the formation of a dark blue polymer precipitate. IR (oil)  $\nu$ , cm<sup>-1</sup>: 3389-3330 (unpermitted), 2951 s, 2853 s, 1701 w, 1587 m, 1530 m, 1462 s, 1456 s, 1377 s, 1165 w, 1119 w, 989 w, 932 w, 806 w, 721 m. Found, %: C 54.30, H 4.41, Br 19.45, N 5.61, S 16.79. Calculated, %: C 54.41, H 4.57, Br 19.05, N 6.68, S 15.29.

**e) Synthesis of 4-benzyl-N,N-diethyl-4H-thieno[3,2-*b*]pyrrole-5-carboxamide (11).** Diethylamine (45 mg, 0.618 mmol) was added to a solution of acid chloride **10** (0.17 g, 0.618 mmol). The latter compound was obtained according to [S1]. The mixture was boiled until the reaction was completed (TLC control), then cooled, washed with a cold 5% HCl solution. The organic layer was dried over MgSO<sub>4</sub>, and the solvent was evaporated. The reaction product was isolated by column chromatography on SiO<sub>2</sub>. Yield 0.10 g (53%). Dark yellow oil. IR (film)  $\nu$ , cm<sup>-1</sup>: 2970, 2934, 2874, 1616, 1528, 1497, 1475, 1458, 1420, 1341, 1267, 1217, 1155, 1084, 1028, 943, 841, 785, 748, 716, 700, 656. <sup>1</sup>HNMR (CDCl<sub>3</sub>,  $\delta$ , ppm, J/Hz): 1.08 t (6H, *J* = 7.1, CH<sub>3</sub>), 3.39 q (4H, *J* = 7.1, CH<sub>2</sub>), 5.46 s (2H, CH<sub>2</sub>Ph), 6.57 s (1H, H-6), 6.88 d (1H, *J* = 5.2, H-3), 7.13 d (2H, *J* = 6.7, Ph), 7.15 d (1H, *J* = 5.3, H-2), 7.20-7.26 m

(3H, Ph).  $^{13}\text{C}$ NMR ( $\text{CDCl}_3$ ,  $\delta$ , ppm): 13.36 ( $\text{CH}_3$ ), 41.50 ( $\text{NCH}_2$ ), 50.20 ( $\text{NCH}_2$ ), 102.74 (C-6), 110.56 (C-3), 121.87 (C-6a), 125.85 (C-2), 127.26 (C-Ph), 127.50 (C-Ph), 128.51 (C-Ph), 130.69 (C-5), 138.14 (C-Ph), 142.58 (C-3a), 163.70 ( $\text{CO}_2\text{Me}$ ).  $m/z$  (EI, %): 313  $[\text{MH}]^+$  (100%), 354  $[\text{MH} + \text{MeCN}]^+$  (19).

**f) Synthesis of N-[(4-benzyl-4H-thieno[3,2-b]pyrrol-5-yl)methyl]-N,N-diethylamine (12).** A THF solution of amide **11** (0.12 g, 0.384 mmol in 5 mL) was added to a suspension of  $\text{LiAlH}_4$  (30 mg, 0.77 mmol) in 5 mL of THF, the reaction mixture was stirred on heating until the starting amide was disappeared (TLC control). The excess hydride was decomposed by adding a saturated solution of  $\text{NH}_4\text{Cl}$  with followed evaporation of the solvent. The residue was dissolved in  $\text{CH}_2\text{Cl}_2$ , washed with a saturated solution of  $\text{NaCl}$ , dried over  $\text{MgSO}_4$ , then the solvent was evaporated. The product was isolated by column chromatography on a  $\text{SiO}_2$  column (eluent–chloroform : methanol, 30:1). The amount of 0.03 g (27%) of amine **12** was obtained as a dark yellow oil. IR (film)  $\nu$ ,  $\text{cm}^{-1}$ : 2966, 2928, 2806, 1653, 1518, 1454, 1400, 1358, 1335, 1294, 1196, 1165, 1115, 1084, 1053, 970, 781, 731, 710, 648.  $^1\text{H}$  NMR ( $\text{CDCl}_3$ ,  $\delta$ , ppm,  $J$  Hz): 1.40 t (6H,  $J = 7.1$ ,  $\text{CH}_3$ ), 2.96 q (4H,  $J = 7.2$ ,  $\text{CH}_2$ ), 4.02 s (2H,  $\text{NCH}_2$ ), 5.97 s (2H,  $\text{CH}_2\text{Ph}$ ), 6.79 s (1H, H-6), 7.30 d (1H,  $J = 5.3$ , H-3), 7.49 d (1H,  $J = 5.2$ , H-2), 7.52 d (2H,  $J = 7.4$ , Ph), 7.68 t (1H,  $J = 7.3$ , Ph), 7.73-7.75 m (2H, Ph).  $^{13}\text{C}$ NMR ( $\text{CDCl}_3$ ,  $\delta$ , ppm): 11.36 ( $\text{CH}_3$ ), 46.49 ( $\text{NCH}_2$ ), 49.00 ( $\text{NCH}_2$ ), 51.01 ( $\text{NCH}_2\text{Ph}$ ), 101.90 (C-6), 111.27 (C-3), 122.13 (C-6a), 122.36 (C-2), 126.99 (C-Ph), 127.43 (C-Ph), 128.88 (C-Ph), 136.22 (C-5), 139.44 (C-Ph), 141.66 (C-3a).  $m/z$  (EI, %): 226  $[\text{MH}-\text{CH}_2\text{Ph}+\text{H}_2\text{O}]^+$  (100%).

### g) Dedoping of polymers with hydrazine hydrate

**Dedoping of polymer P-1b.** To 0.21 g of polymer **P-1b** was added 7 mL of hydrazine hydrate and stirred for 4 days at room temperature, then another 3 mL of hydrazine hydrate was added. After 3 days of stirring, the solvent was decanted, the precipitate was washed with solvents (water, acetonitrile, acetone, chloroform, petroleum ether), the precipitate was dried in air, and 0.195 g of an insoluble brown polymer was obtained.

**Dedoping of polymer P-2b.** The reaction proceeds similarly to the dedoping of **P-1b**. Prepared from 0.21 g of **P-2b** and 10 mL of hydrazine hydrate 0.19 g of brown insoluble polymer.

### References

S1) S. A. Torosyan, Z. F. Nuriakhmetova, F. A. Gimalova, M. S. Miftakhov, *Russ. J. Org. Chem.*, 2019, **55**, 1907–1911.

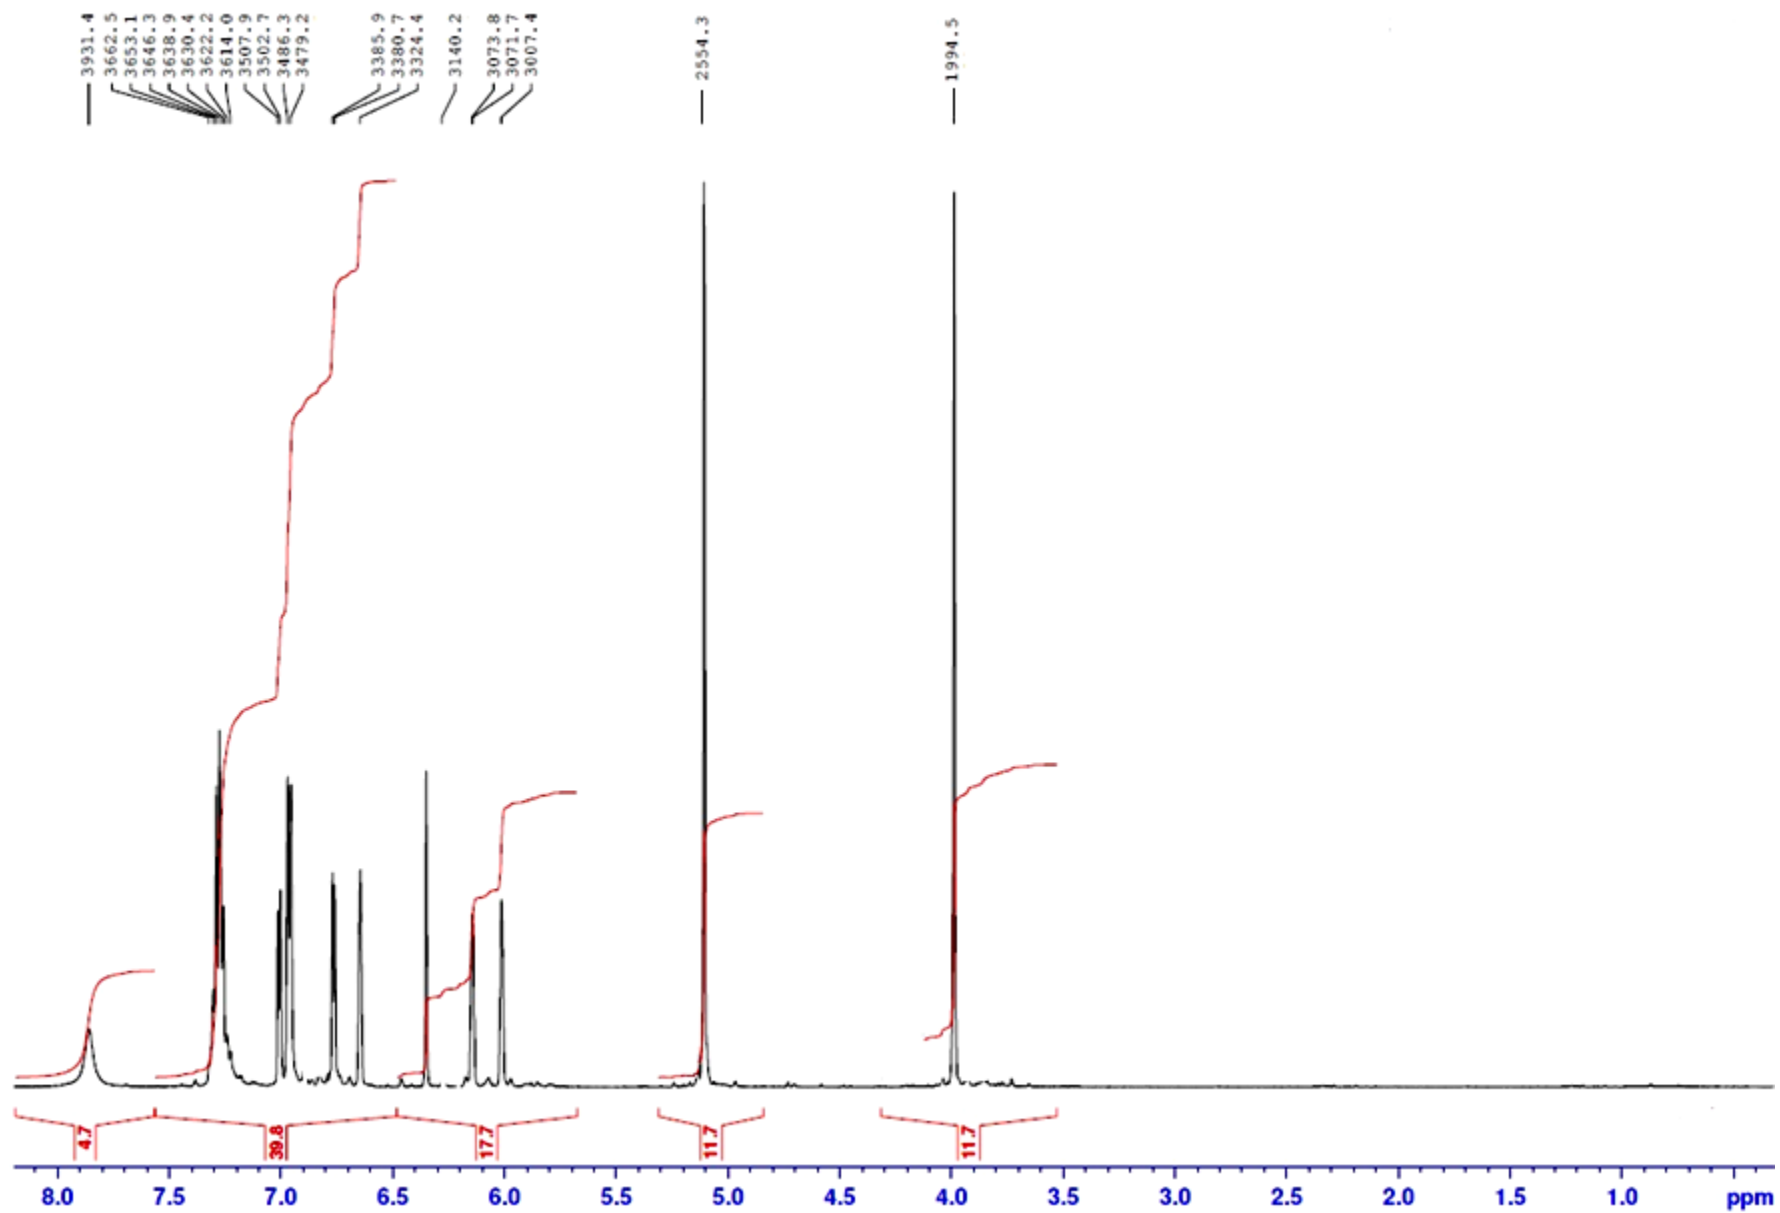

Fig. S1. Complete <sup>1</sup>H NMR spectrum of compound **1b** in CDCl<sub>3</sub>, 500MHz

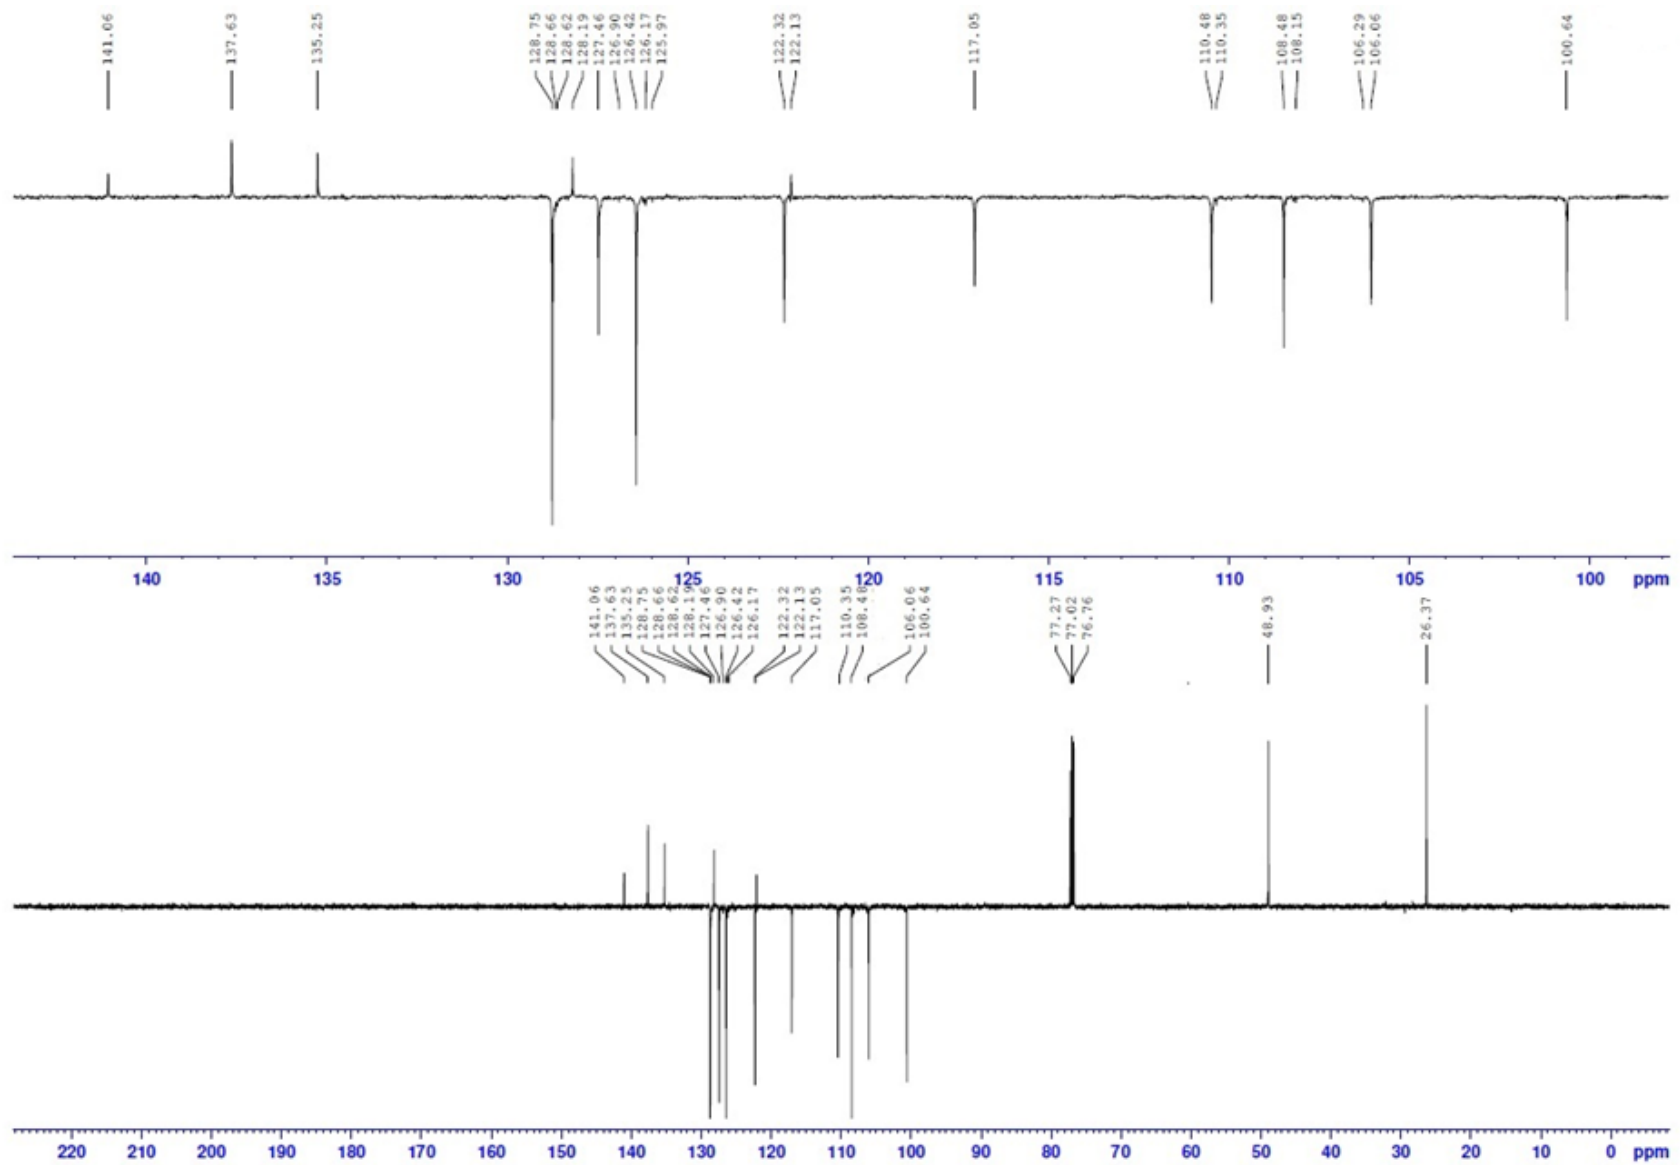

Fig. S2. Complete  $^{13}\text{C}\{^1\text{H}\}$  NMR spectrum of compound **1b** in  $\text{CDCl}_3$ , 125MHz



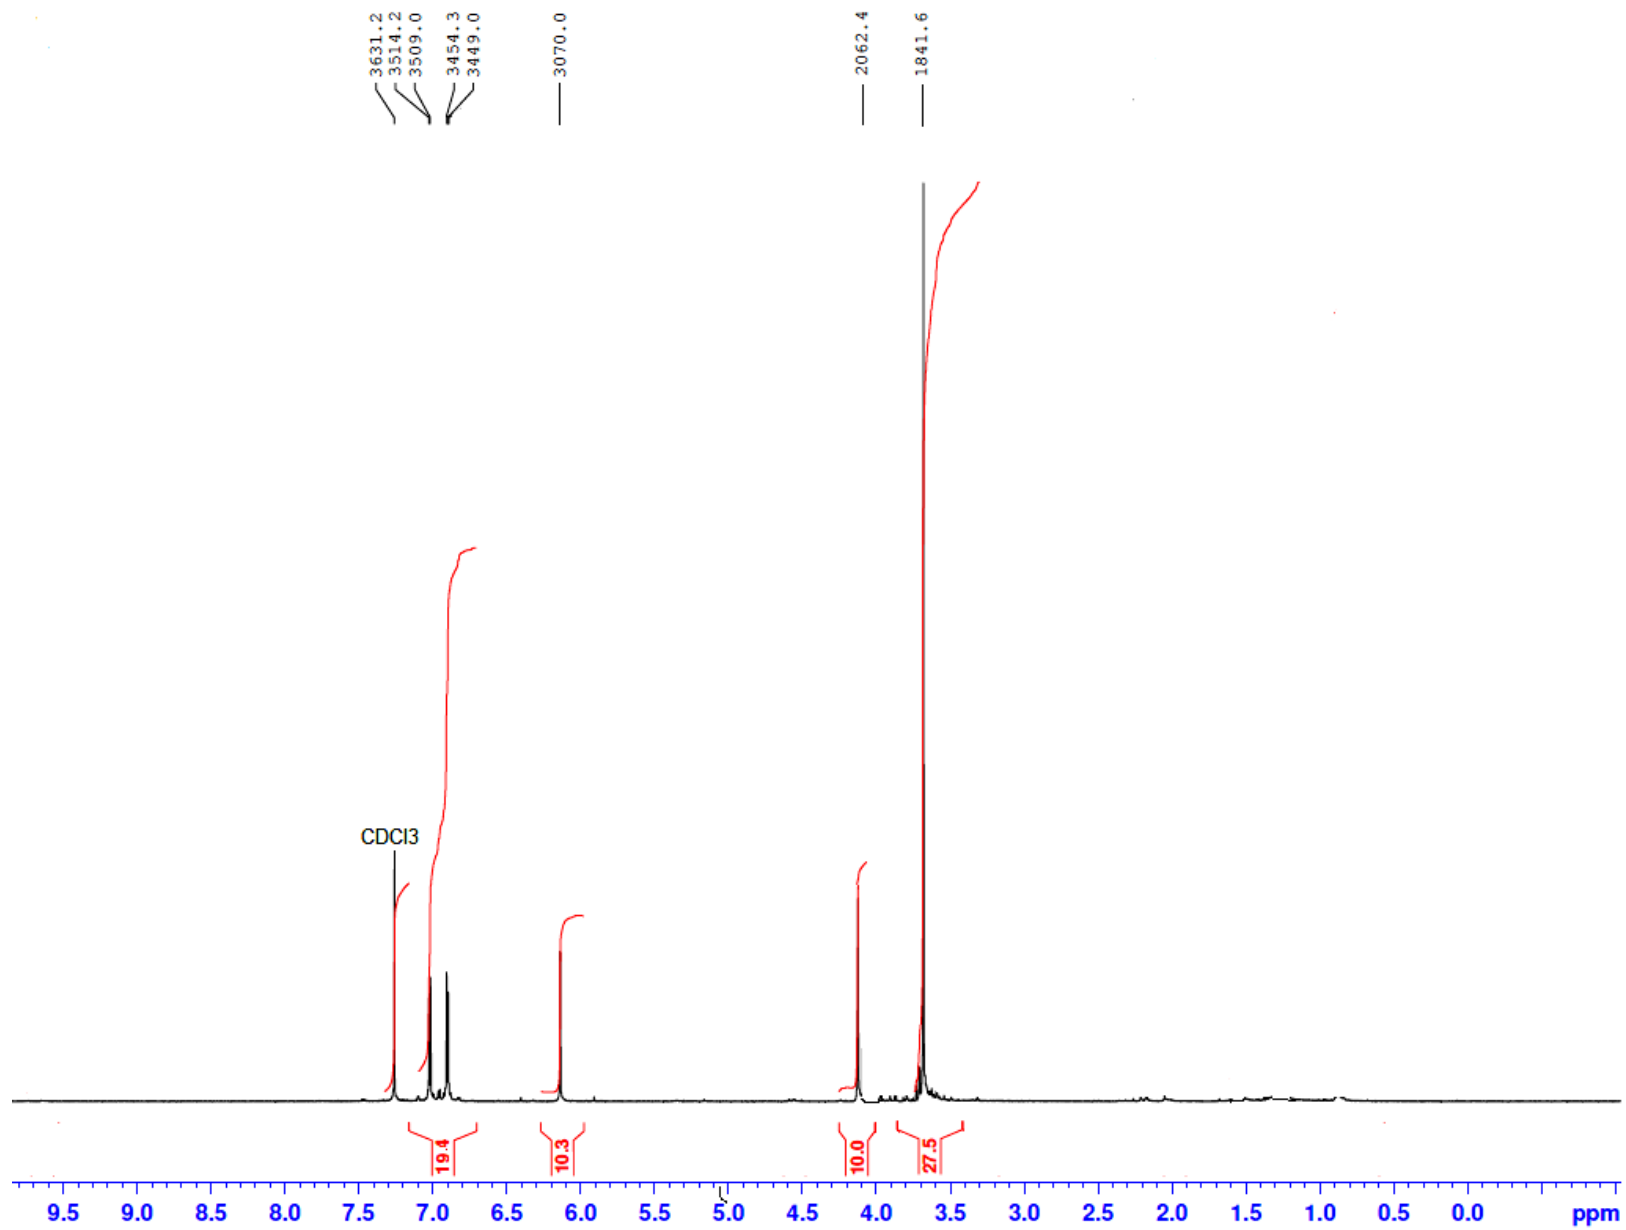

Fig. S3. Complete  $^1\text{H}$  NMR spectrum of compound **2a** in  $\text{CDCl}_3$ , 500MHz

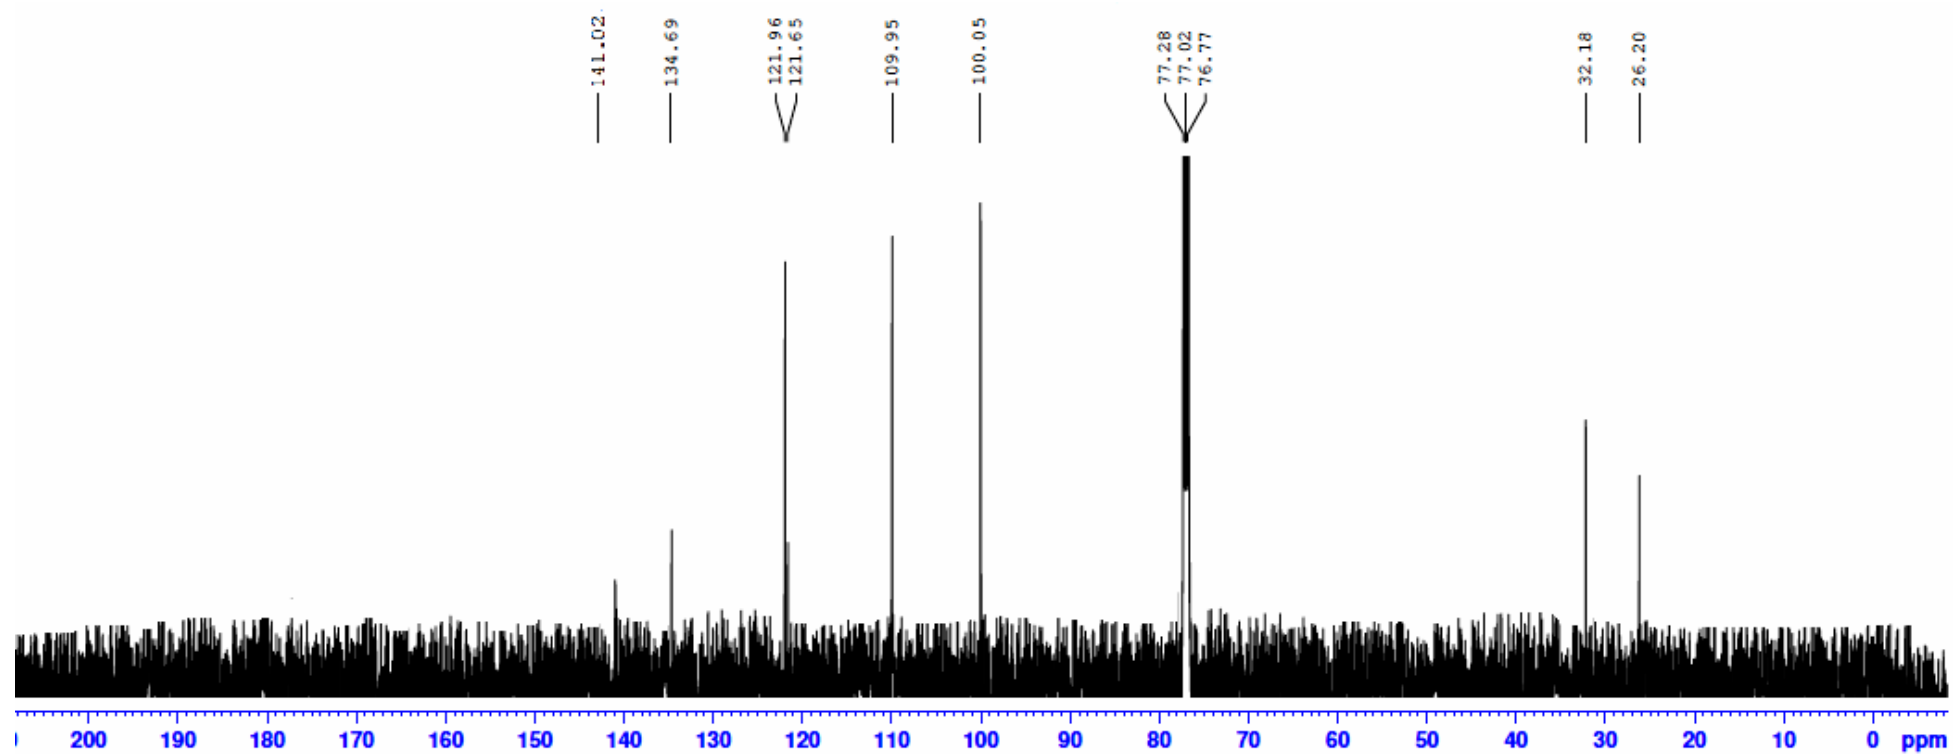

Fig. S4. Complete  $^{13}\text{C}\{^1\text{H}\}$  com NMR spectrum of compound **2a** in  $\text{CDCl}_3$ , 125MHz

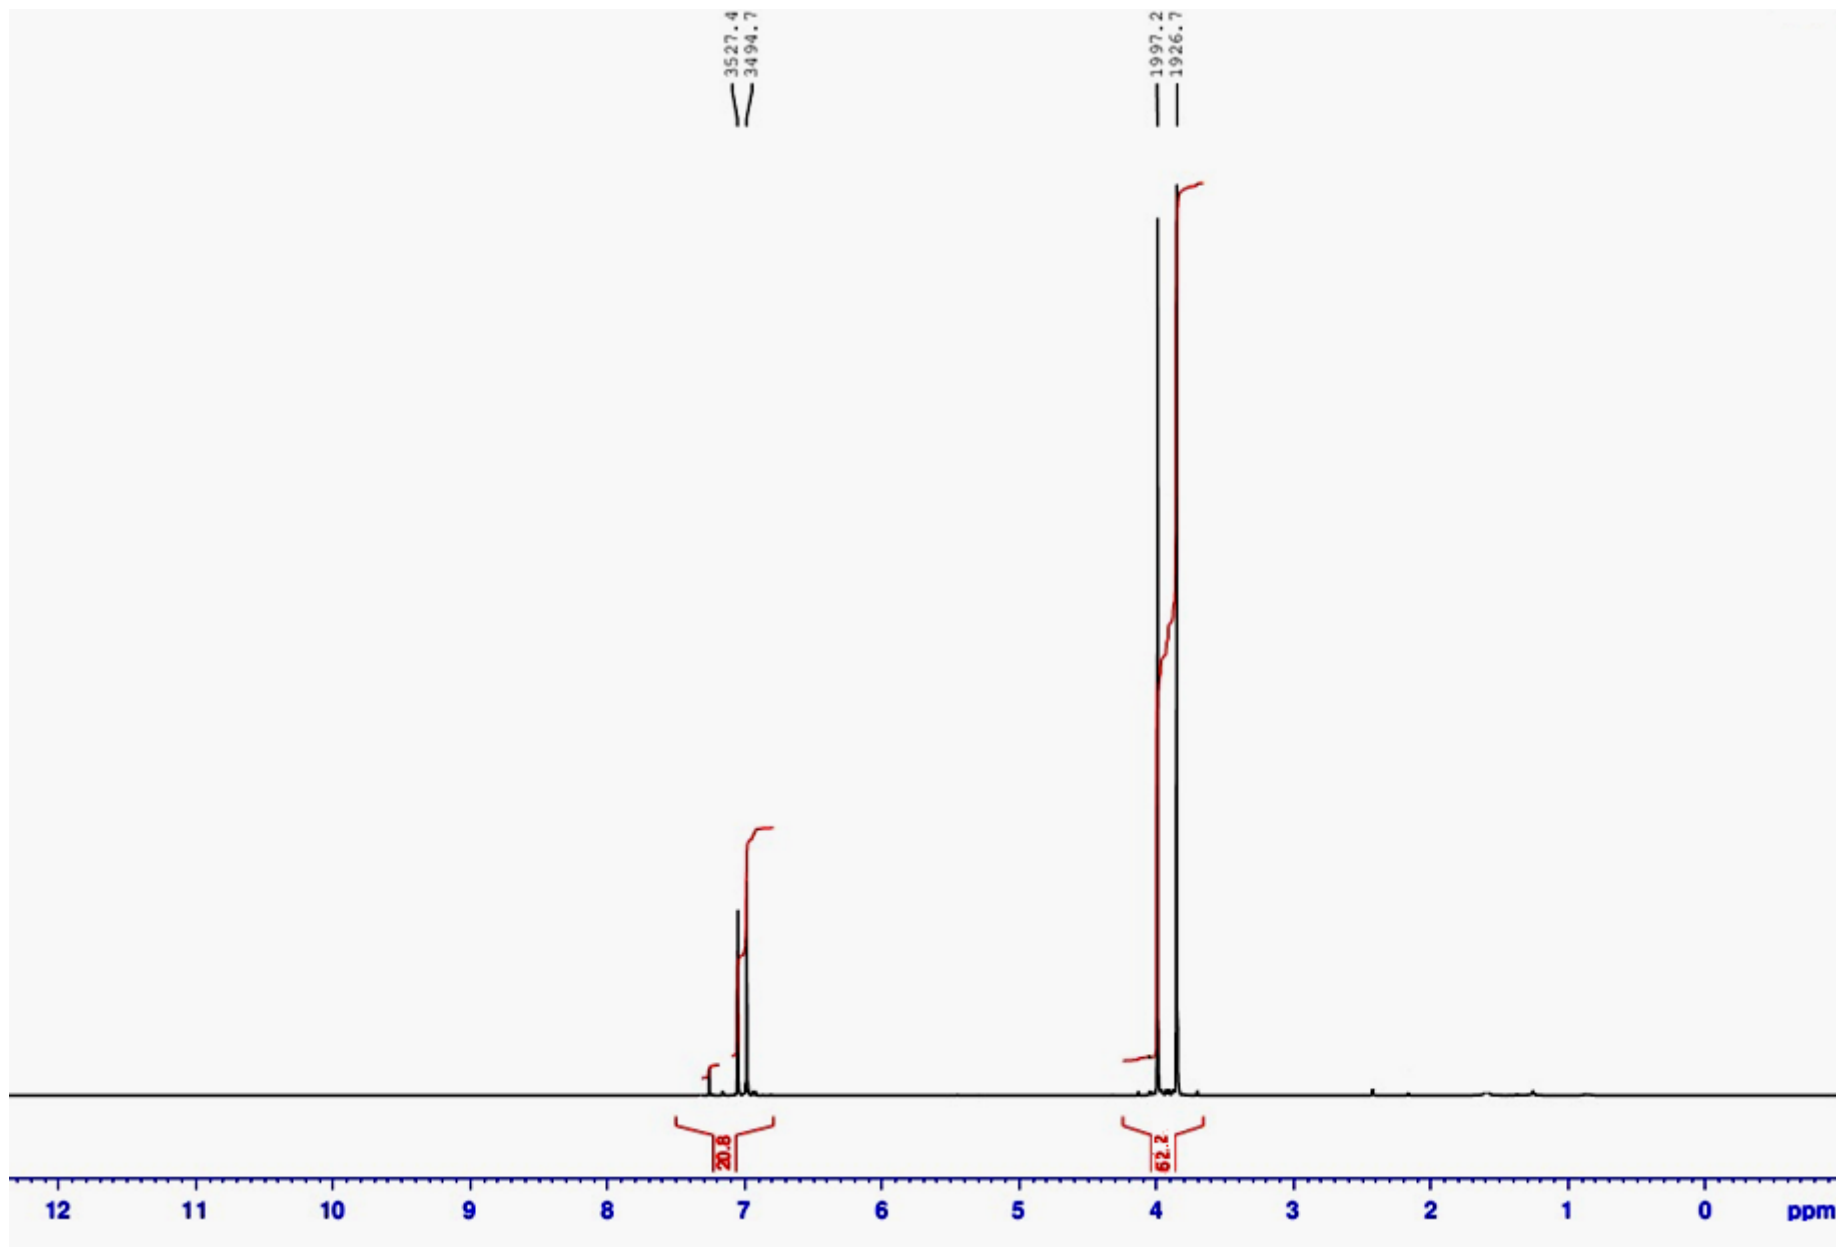

Fig. S5. Complete  $^1\text{H}$  NMR spectrum of compound **4** in  $\text{CDCl}_3$ , 500MHz

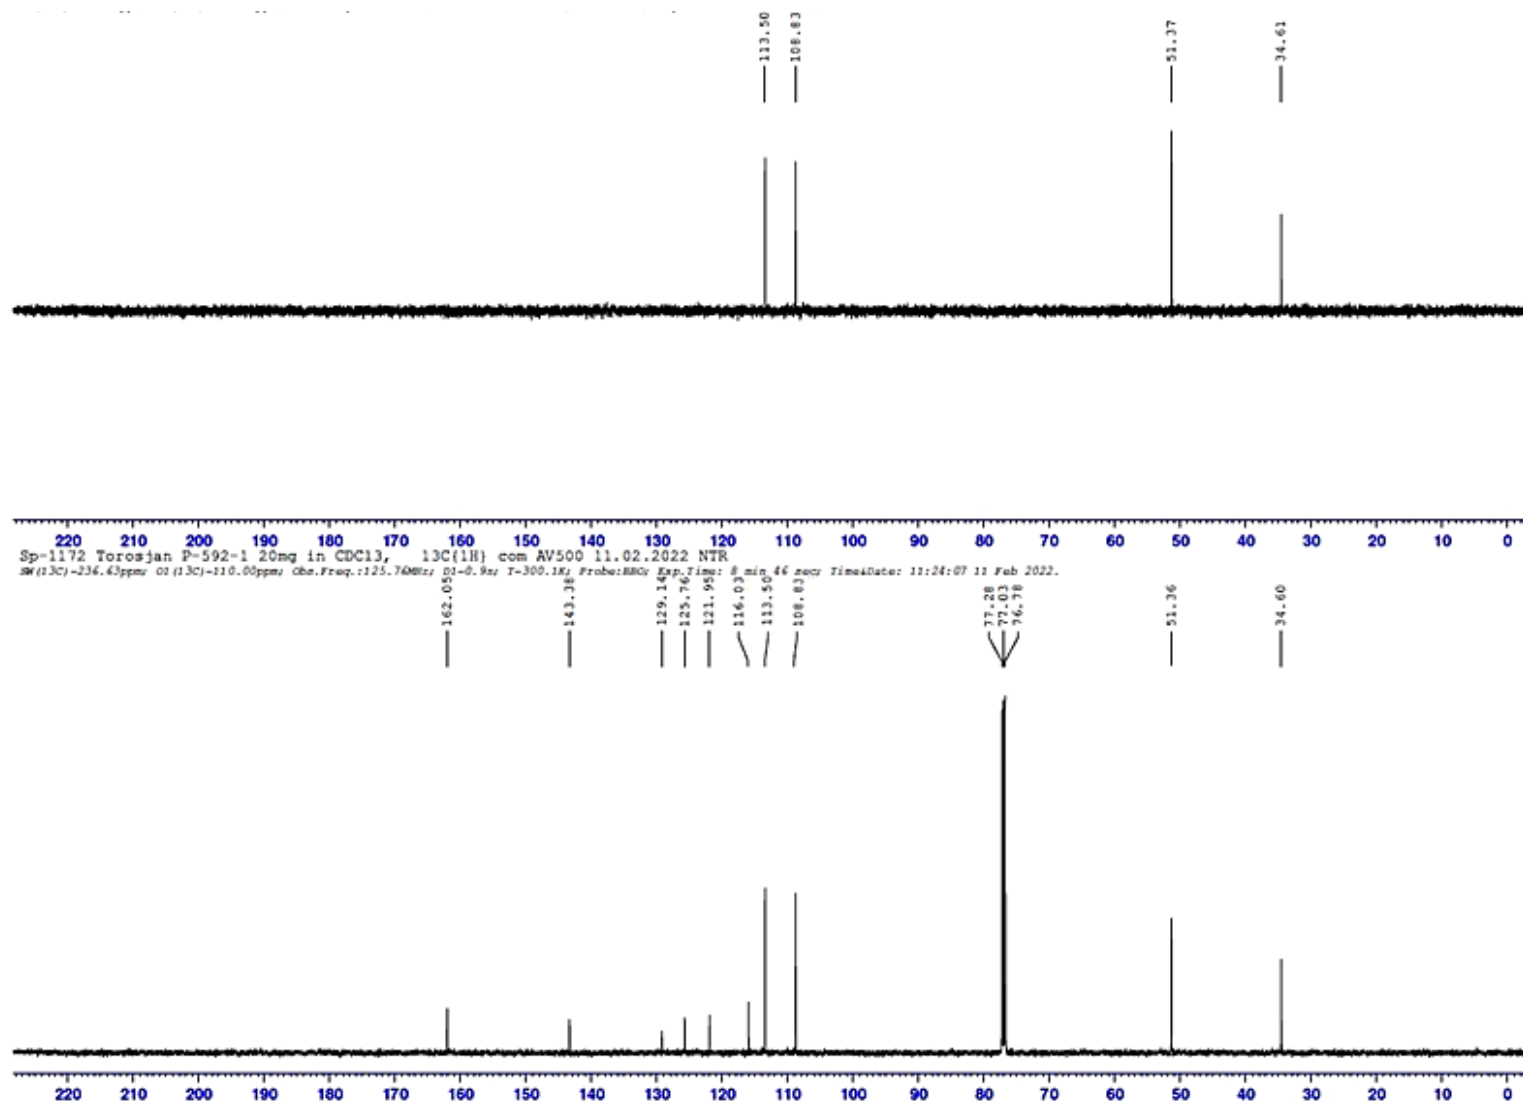

Fig. S6. Complete  $^{13}\text{C}\{^1\text{H}\}$  NMR spectrum of compound 4 in  $\text{CDCl}_3$ , 125MHz

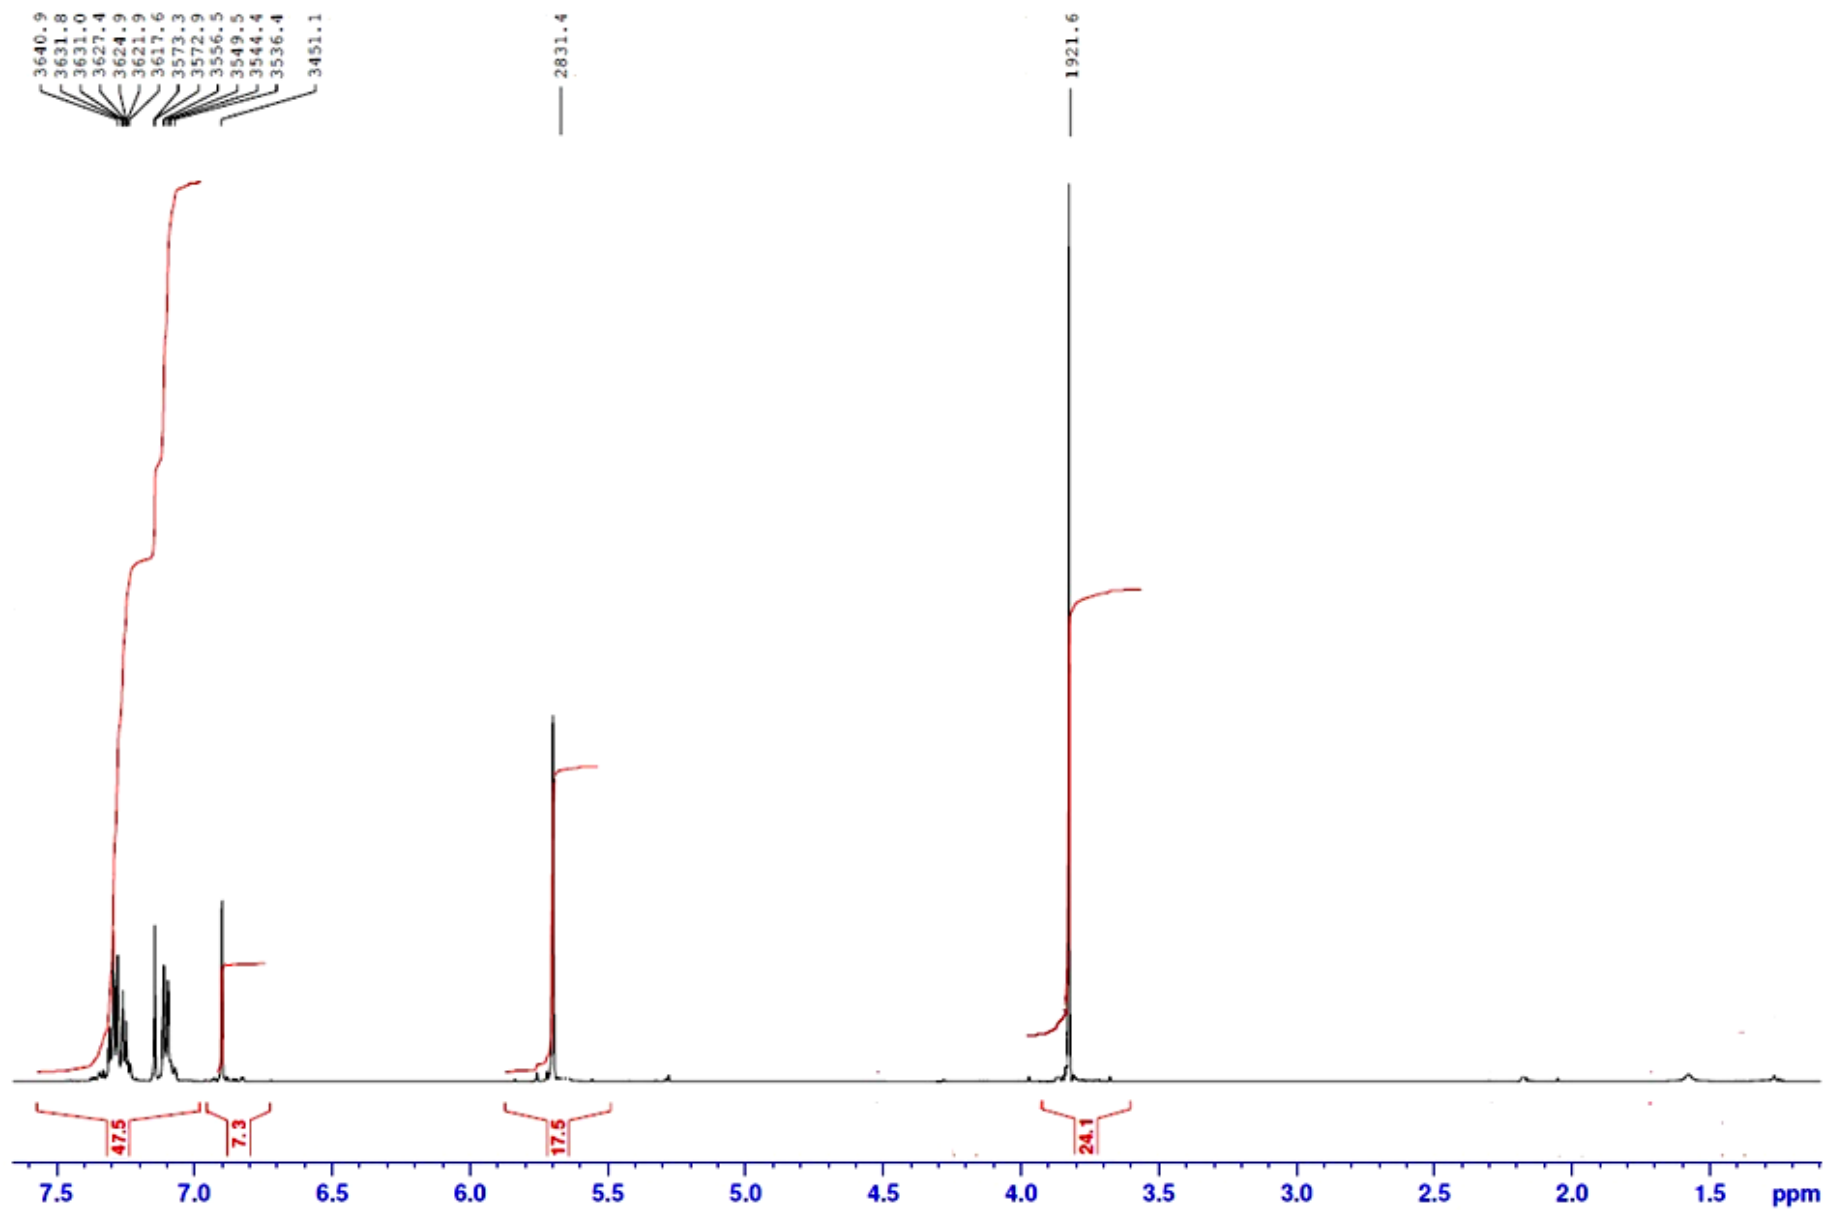

Fig. S7. Complete  $^1\text{H}$  NMR spectrum of compound **6** in  $\text{CDCl}_3$ , 500MHz

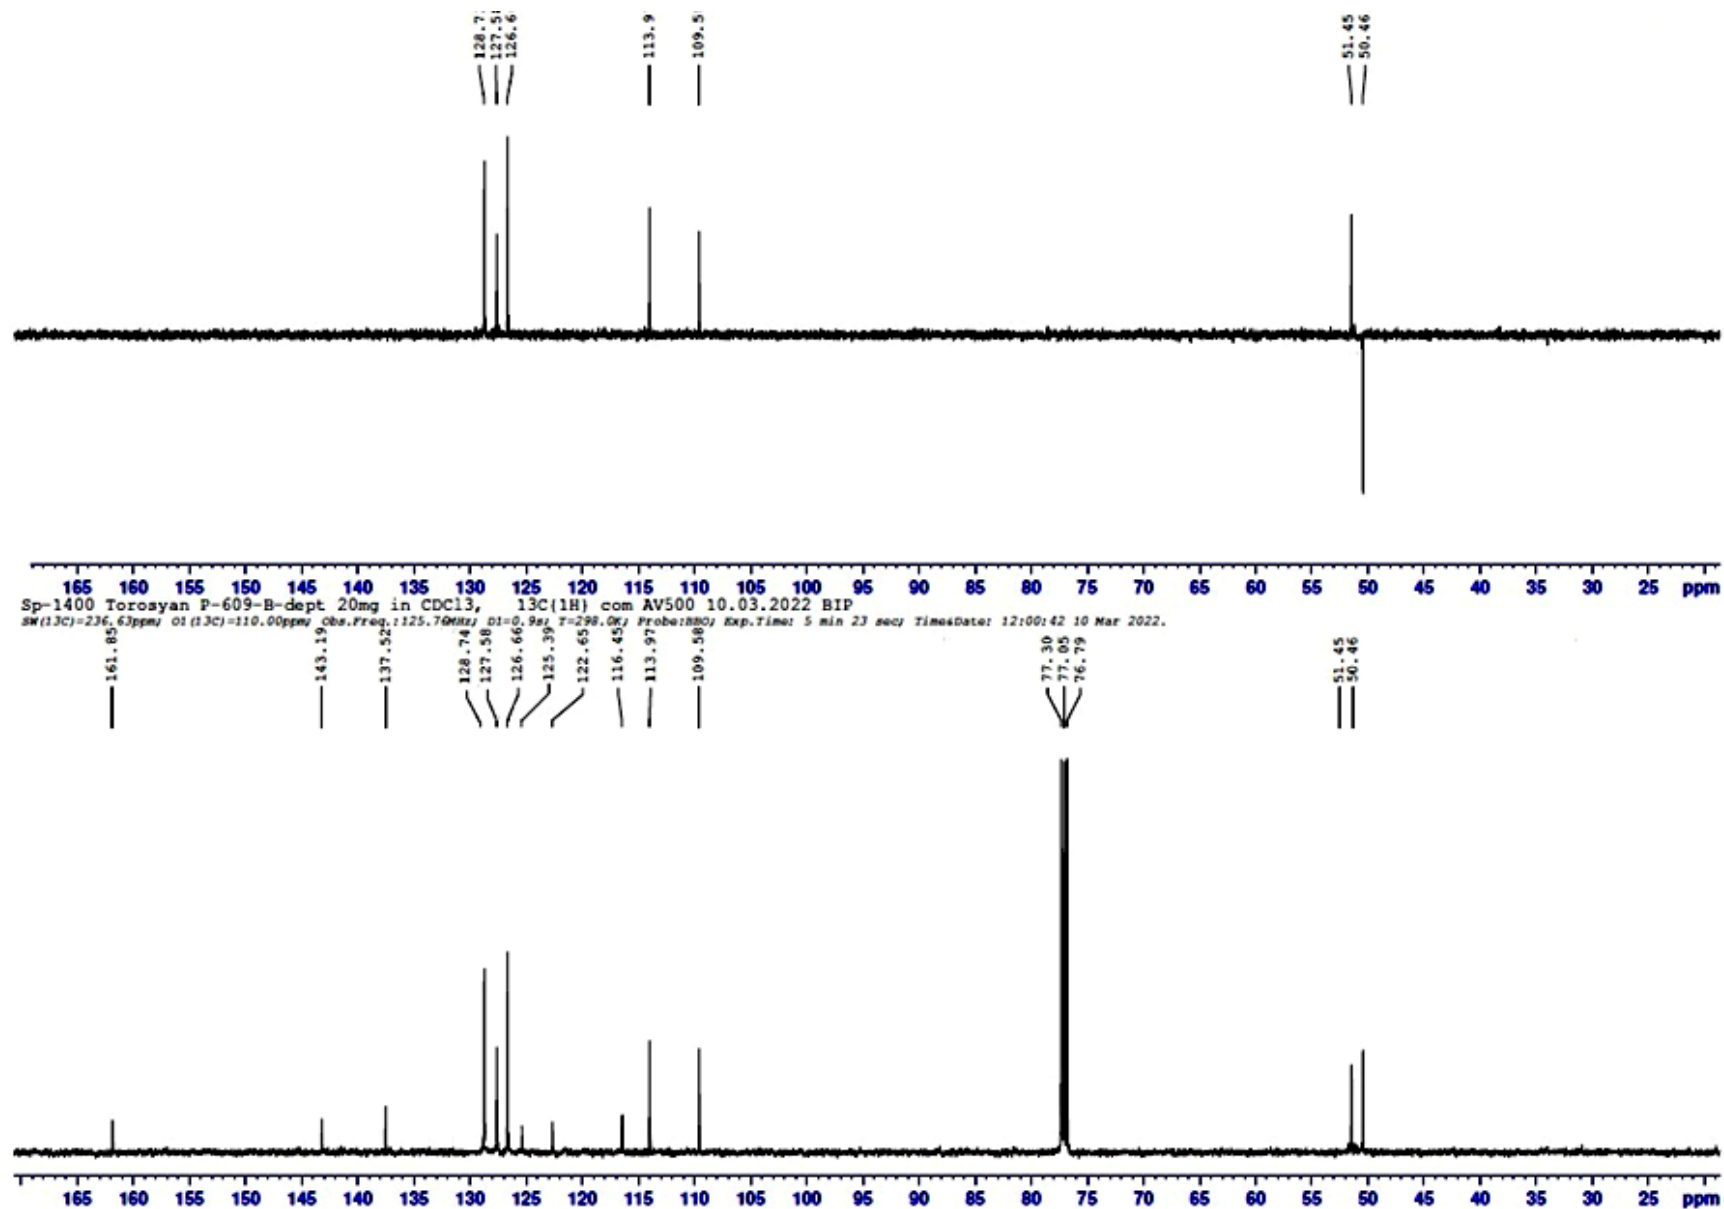

Fig. S8. Complete  $^{13}\text{C}\{^1\text{H}\}$  NMR spectrum of compound **6** in  $\text{CDCl}_3$ , 125MHz

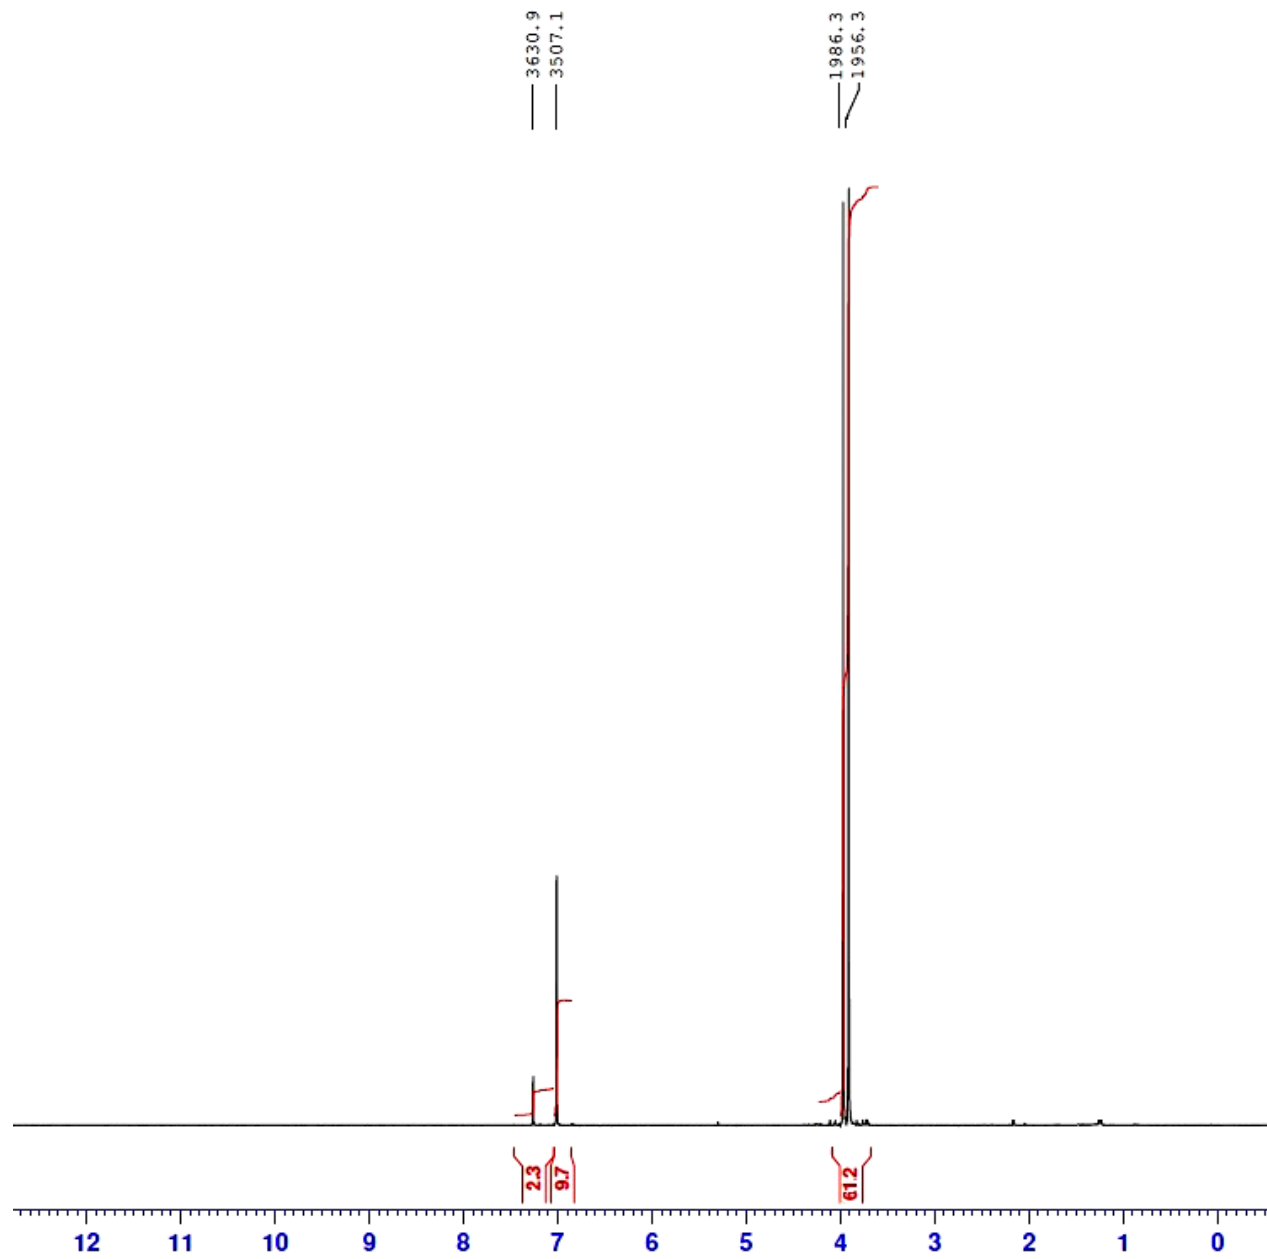

Fig. S9. Complete  $^1\text{H}$  NMR spectrum of compound **8** in  $\text{CDCl}_3$ , 500MHz

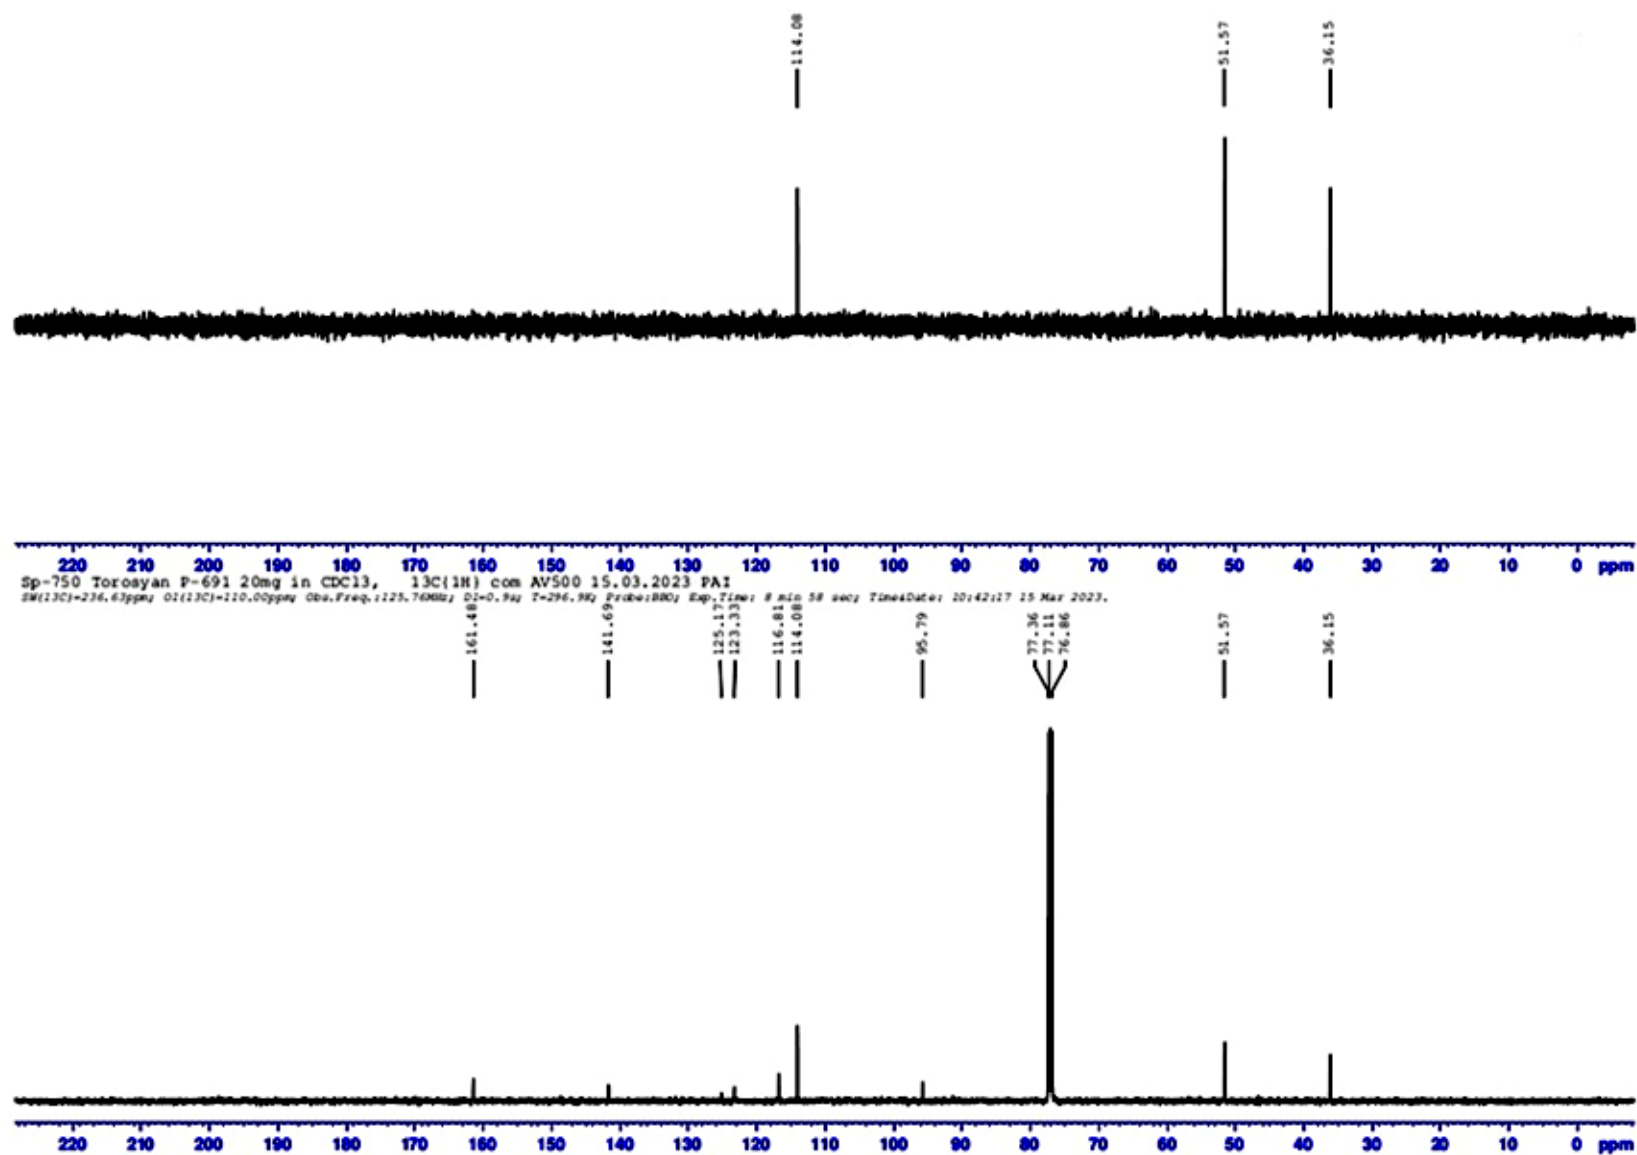

Fig. S10.  $^{13}\text{C}\{^1\text{H}\}$  NMR spectrum of compound **8** in  $\text{CDCl}_3$ , 125MHz



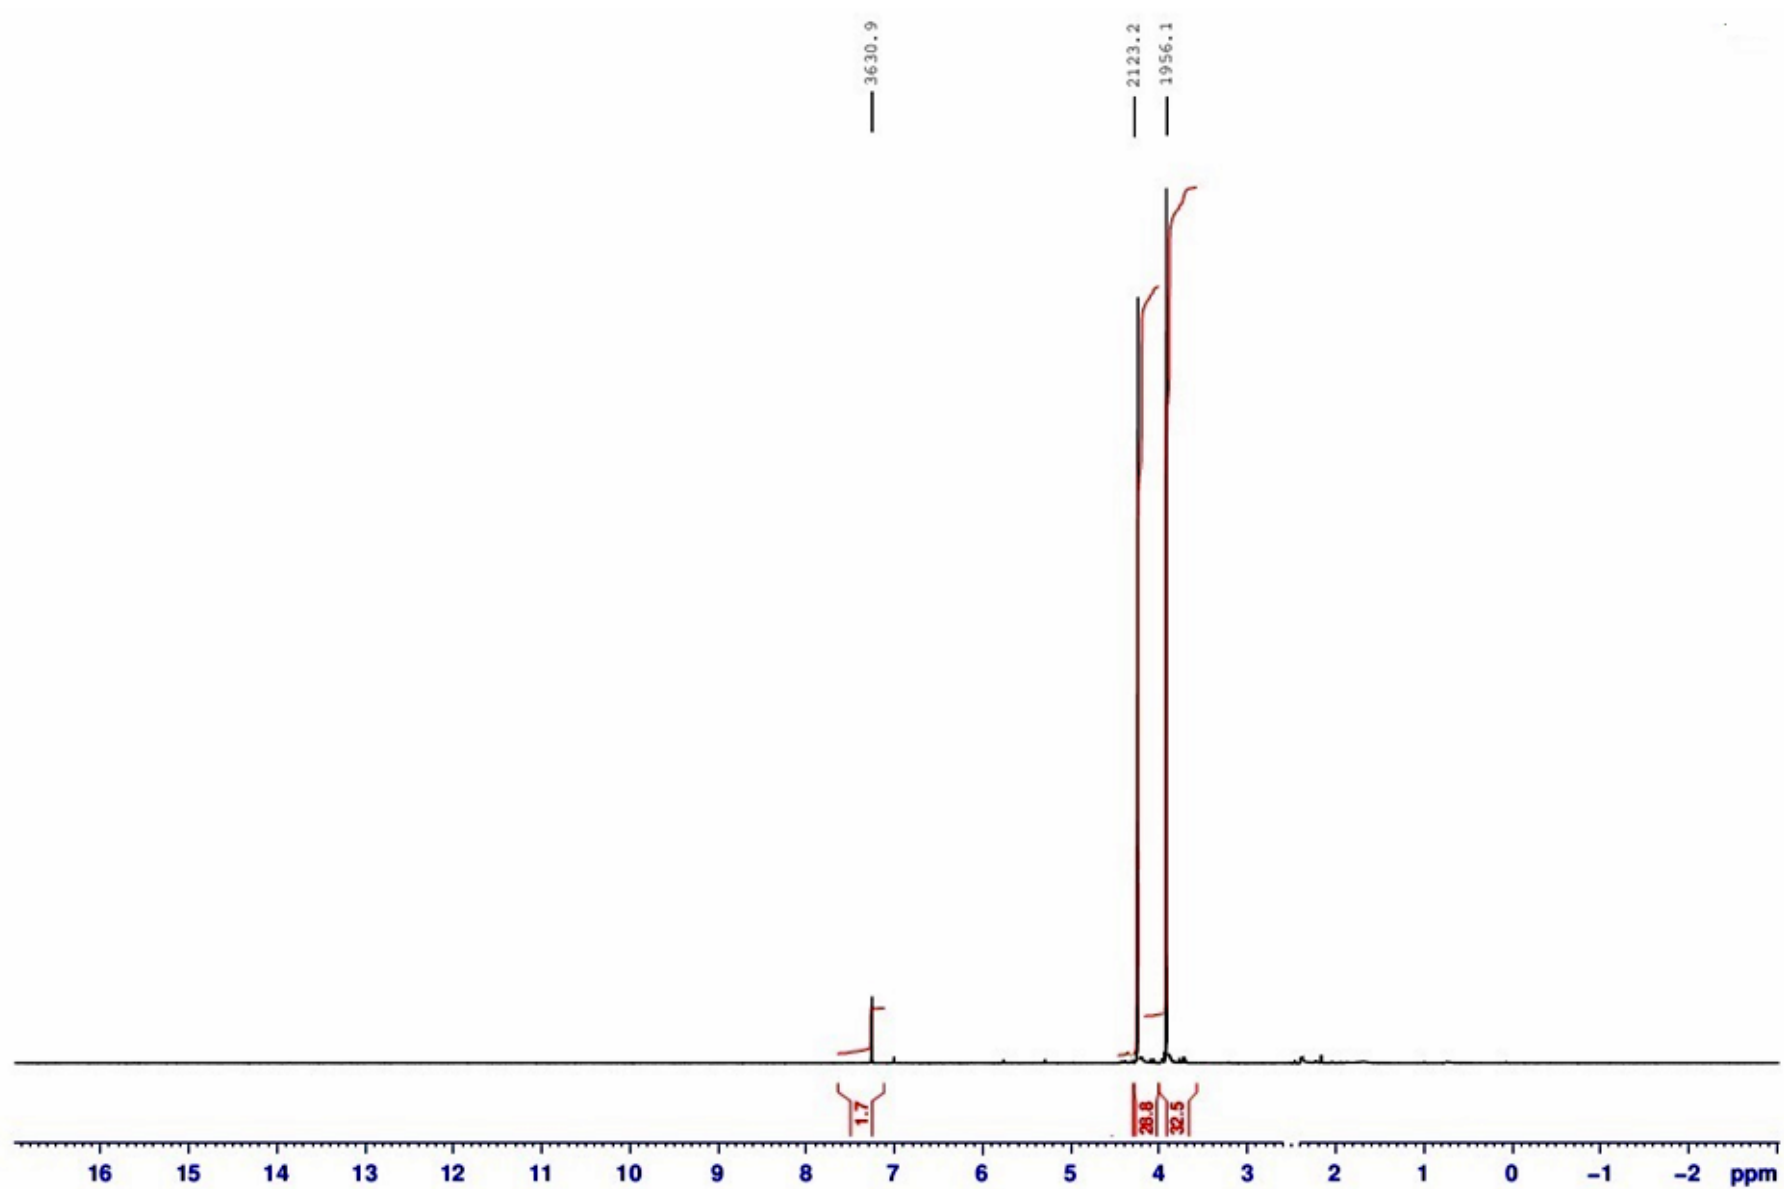

Fig. S11. Complete  $^1\text{H}$  NMR spectrum of compound **9** in  $\text{CDCl}_3$ , 500MHz

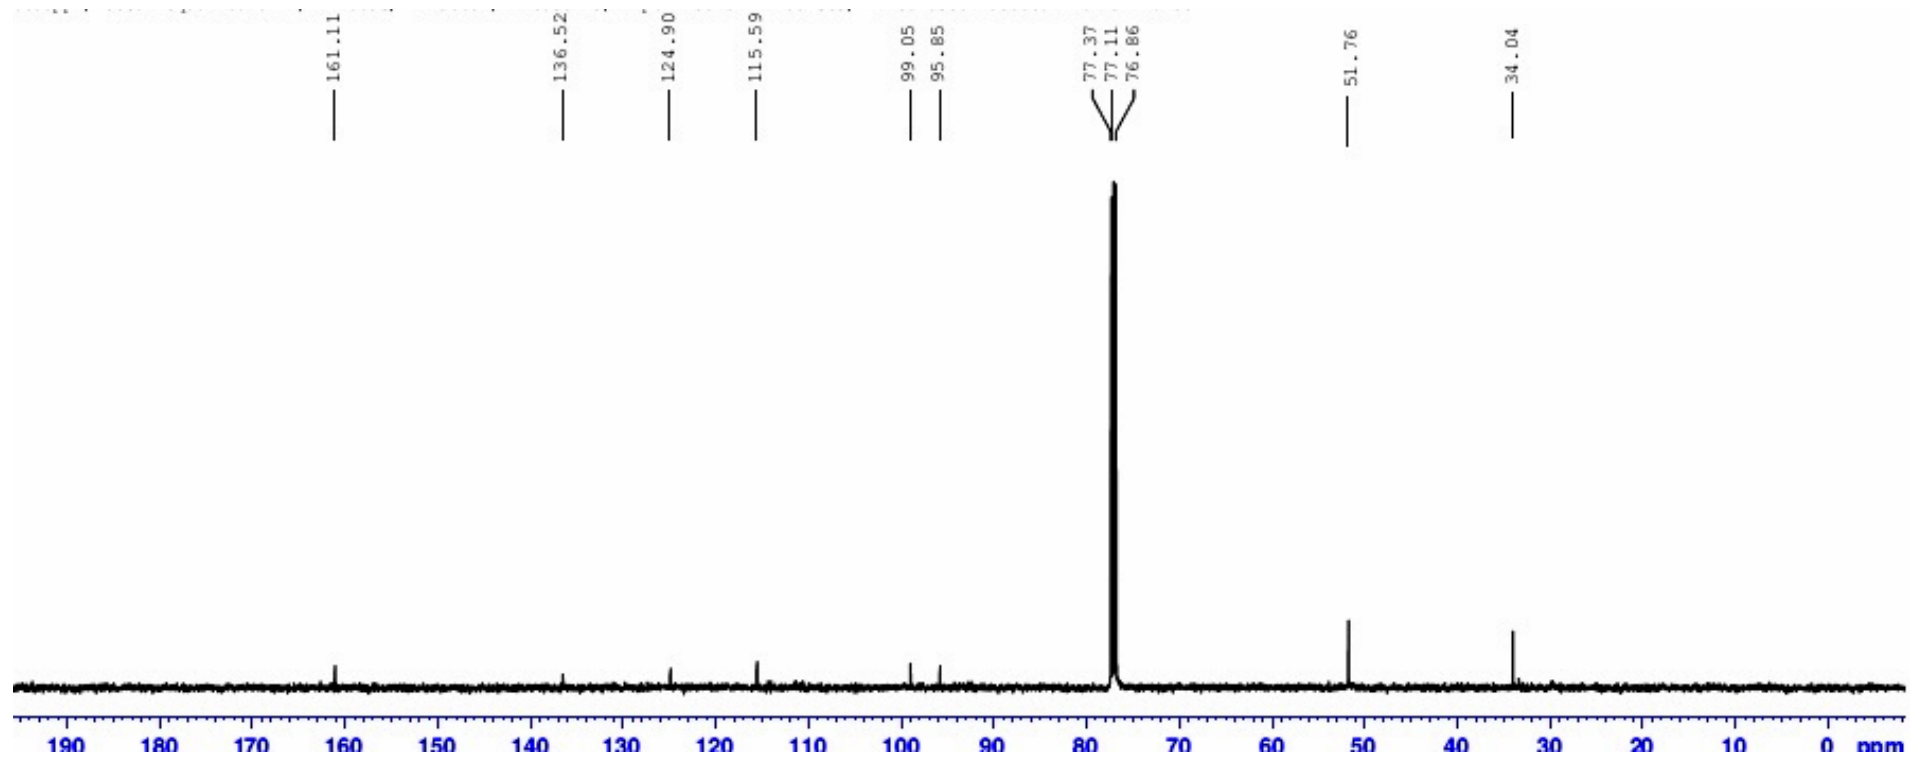

Fig. S12.  $^{13}\text{C}\{^1\text{H}\}$  com NMR spectrum of compound **9** in  $\text{CDCl}_3$ , 125MHz

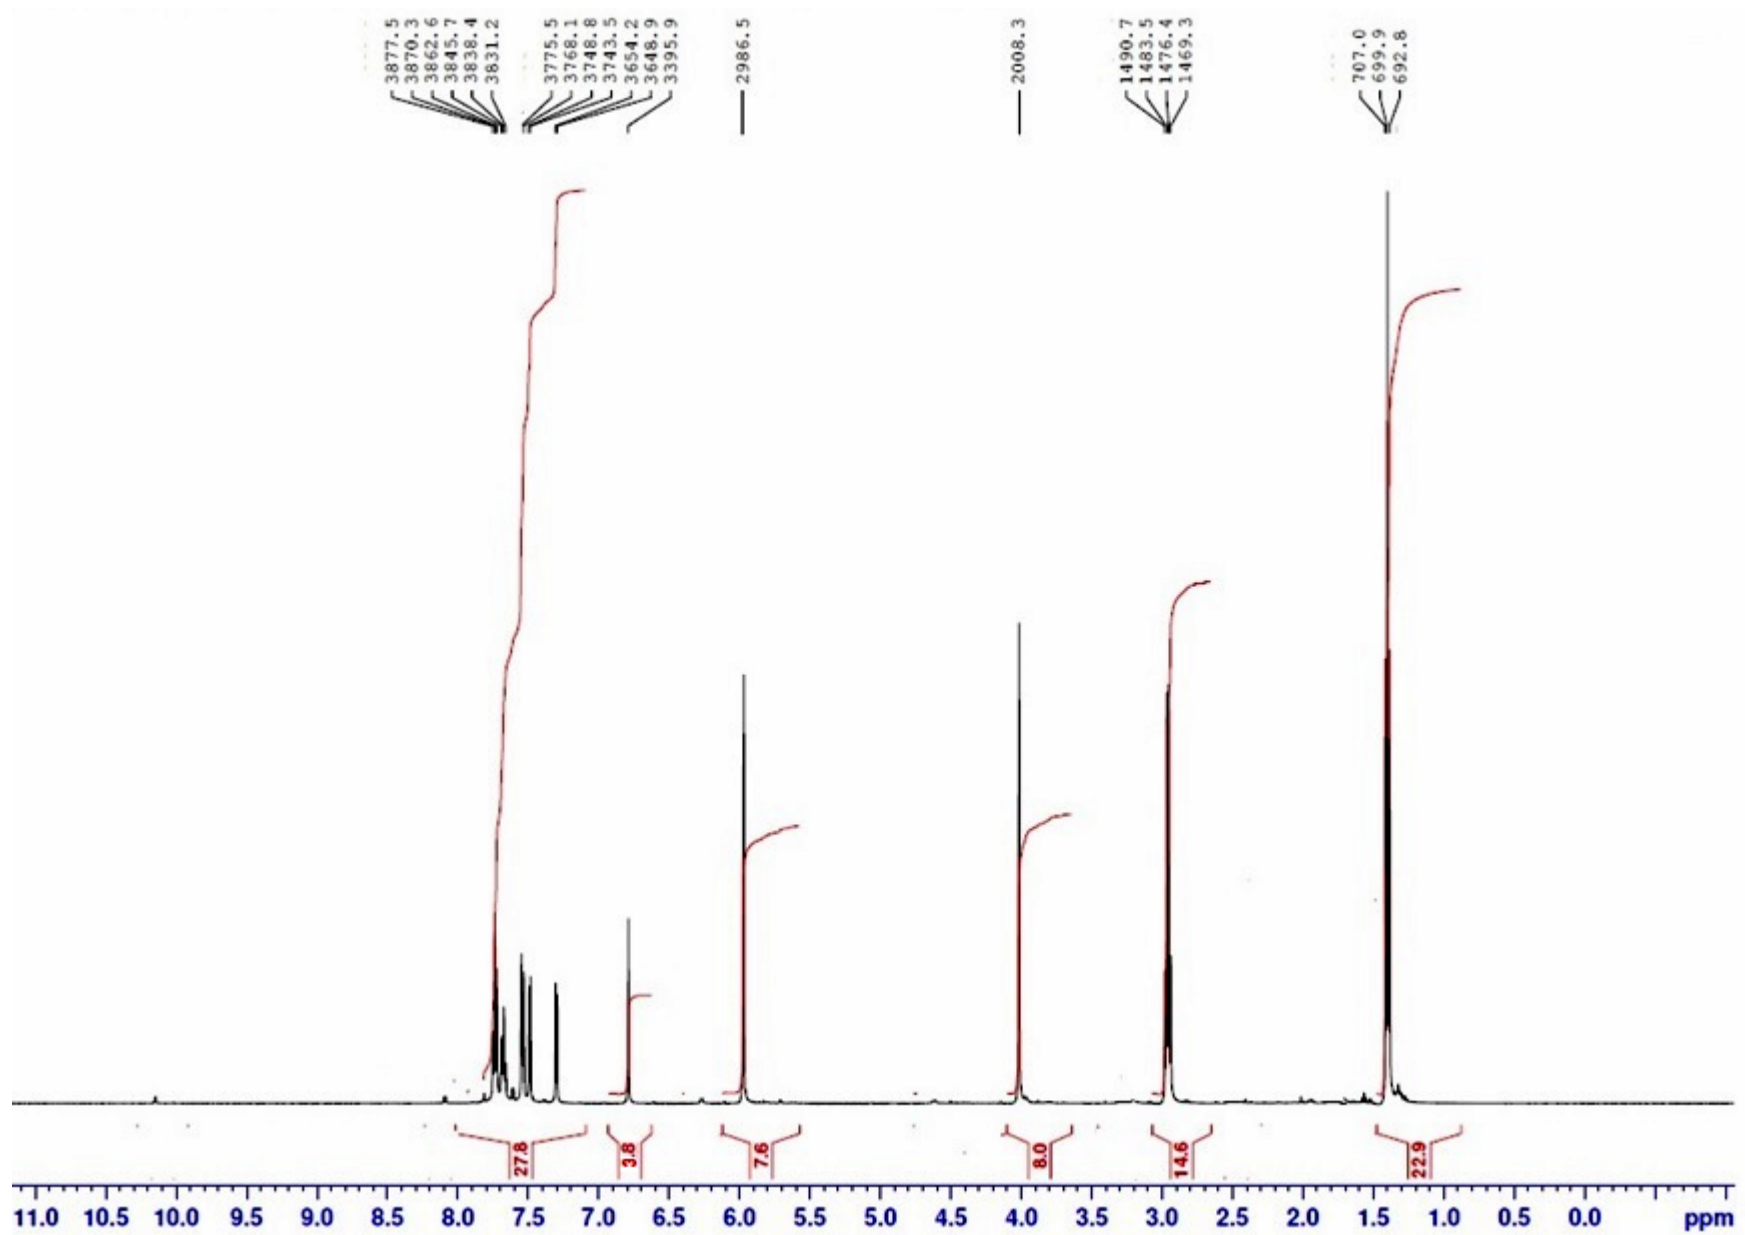

Fig. S13. Complete  $^1\text{H}$  NMR spectrum of compound **12** in in acetone- $d_6$ , 500MHz

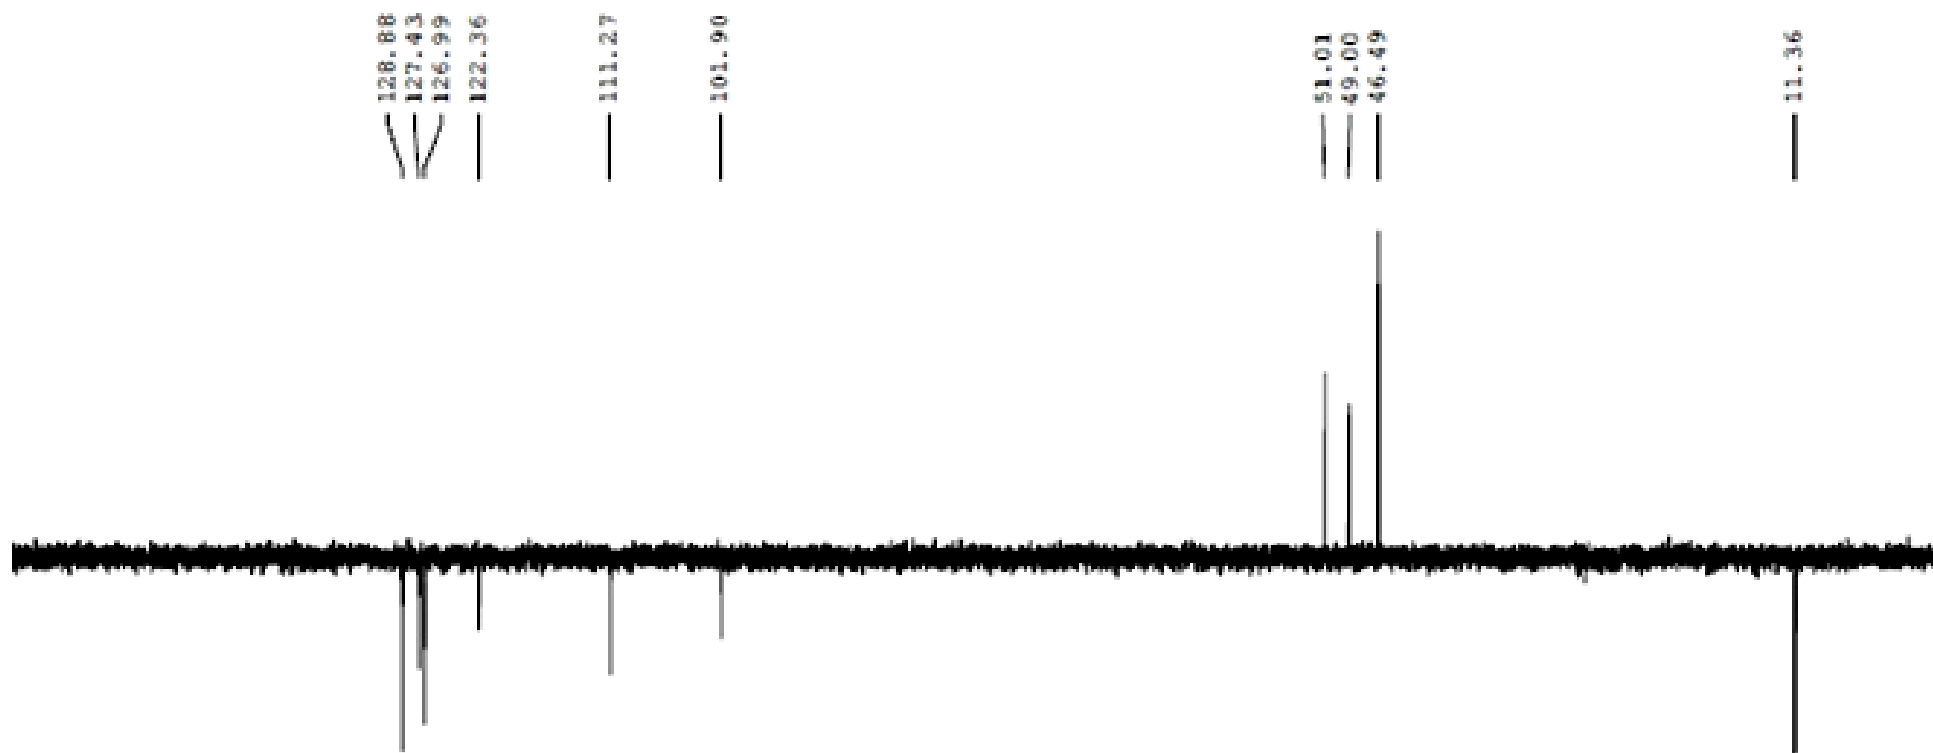

Fig. S14. Complete  $^{13}\text{C}\{^1\text{H}\}$  NMR spectrum of compound **12** in acetone- $d_6$ , 125MHz

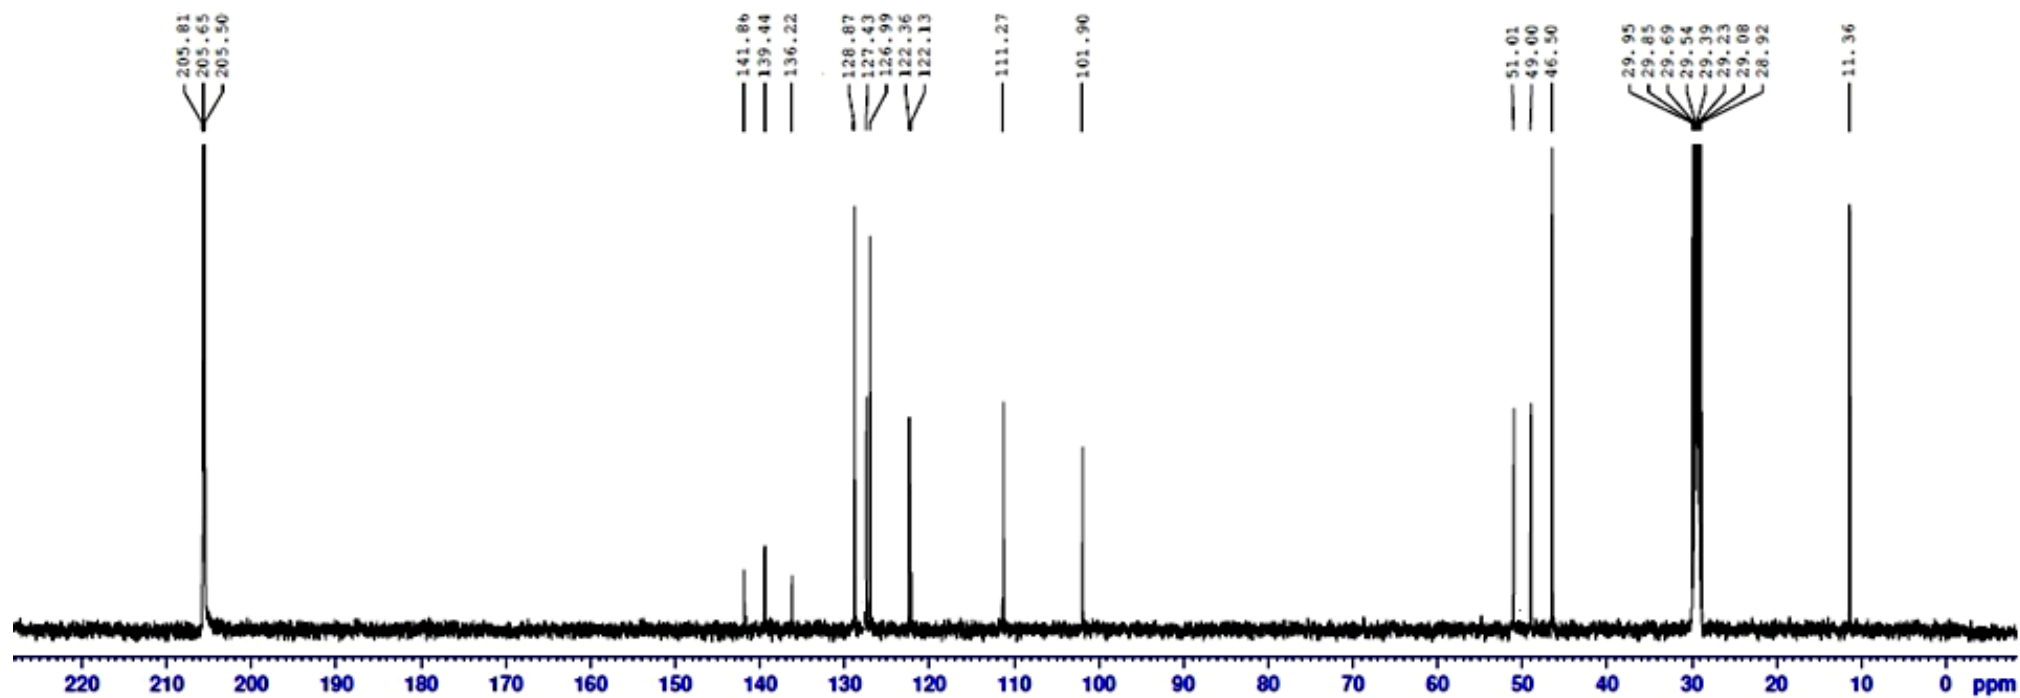

Fig. S15.  $^{13}\text{C}\{^1\text{H}\}$  com NMR spectrum of compound **12** in acetone- $\text{d}_6$ , 125MHz

MeCN/MeOH 100/0, 1.0 ml/min

1 Scan(C+) Ret. Time : 6.100 -> 6.200 min

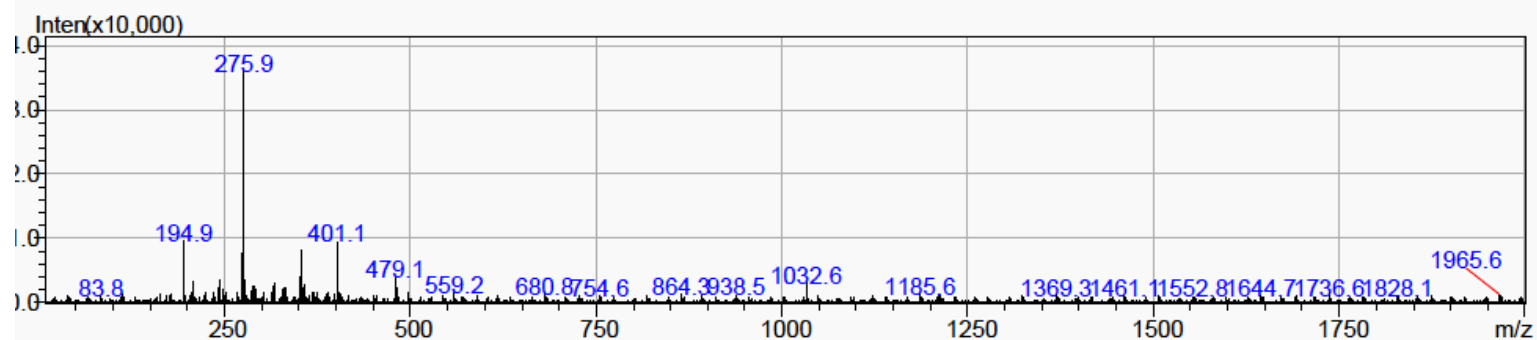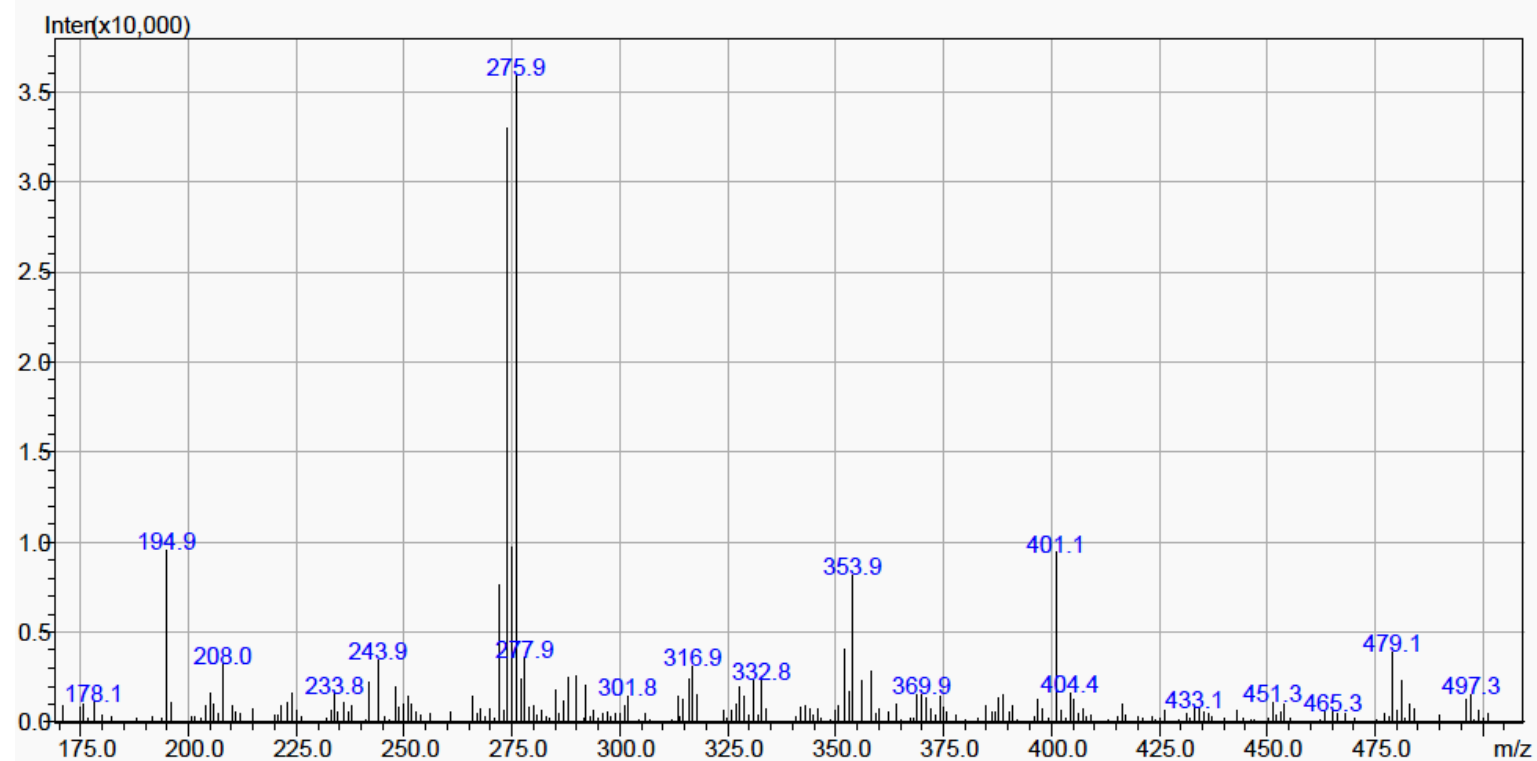

Fig. S16. Mass-spectrum of compound 5

MeCN/HOH 100/0, 0.1 ml/min

1 Scan(C+) Ret. Time : 10.300 -> 10.400min

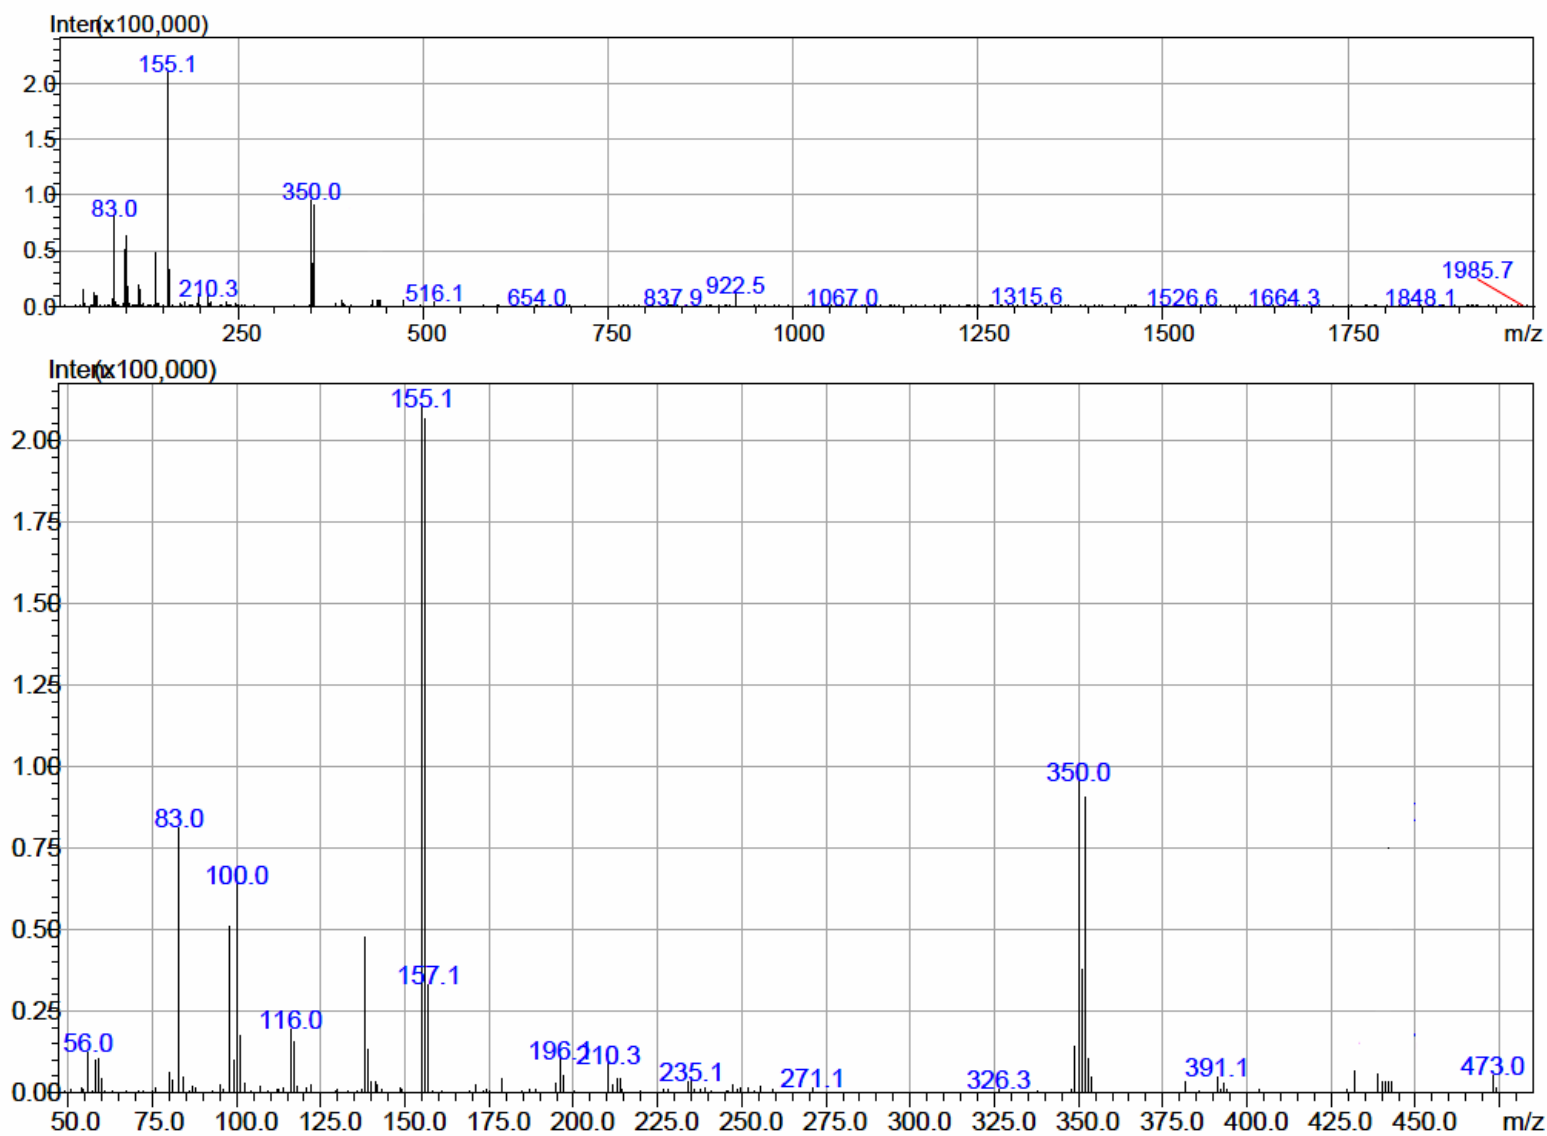

Fig. S17. Mass-spectrum of compound 6

MeCN/HOH 100/0, 0.1 ml/min

1 Scan(C+) Ret. Time : 2.100 - 1.600 min

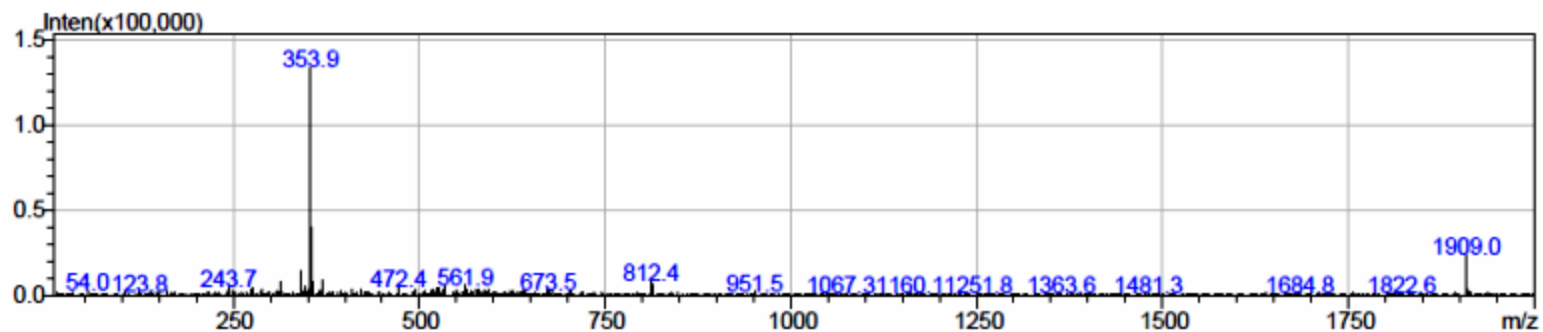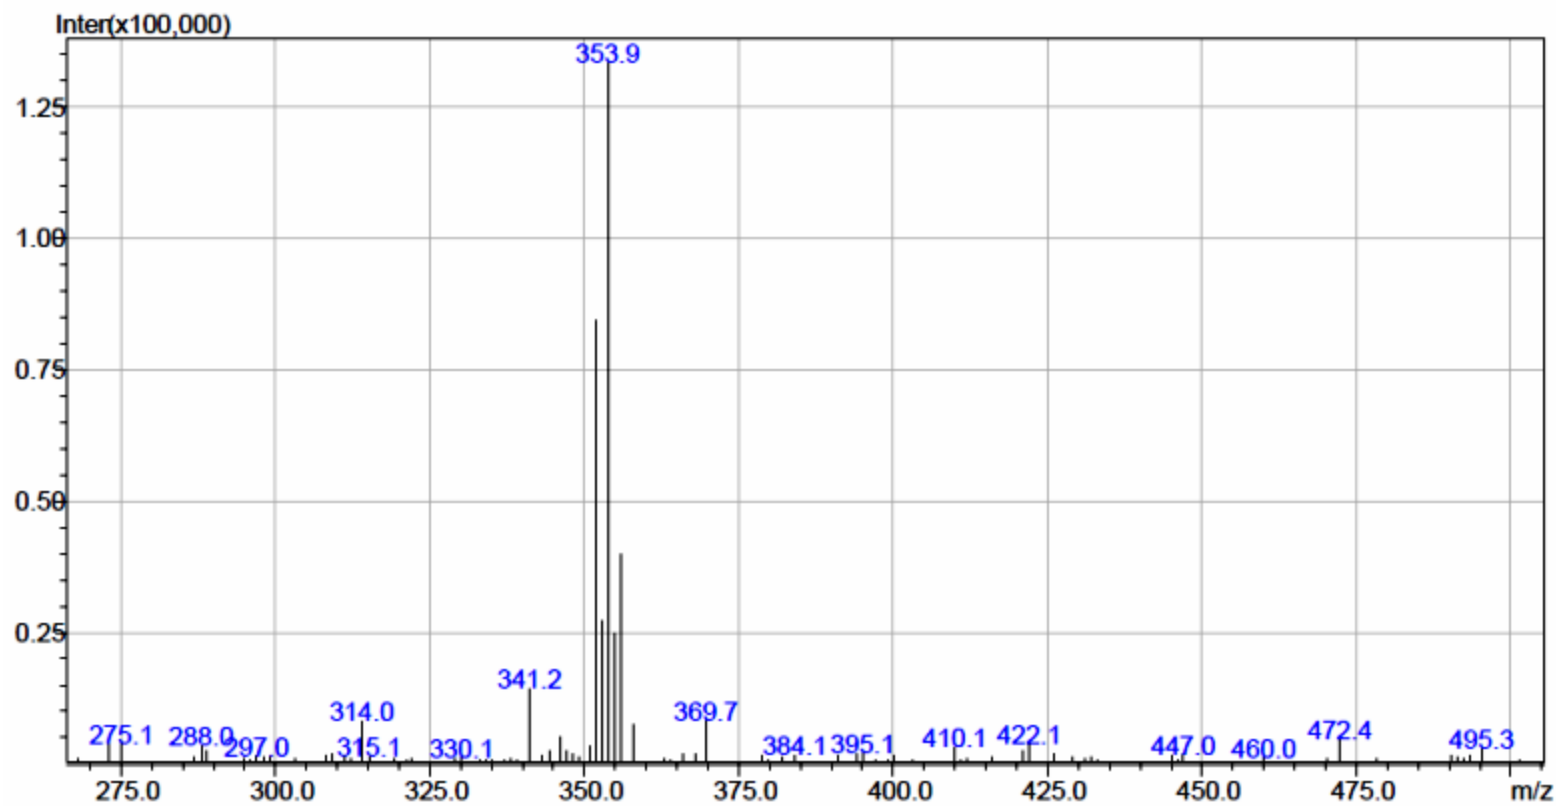

Fig. S18. Mass-spectrum of compound 8



MeCN/HOH 100/0, 0.1 ml/min

1 Scan(C+) Ret. Time : 0.300min

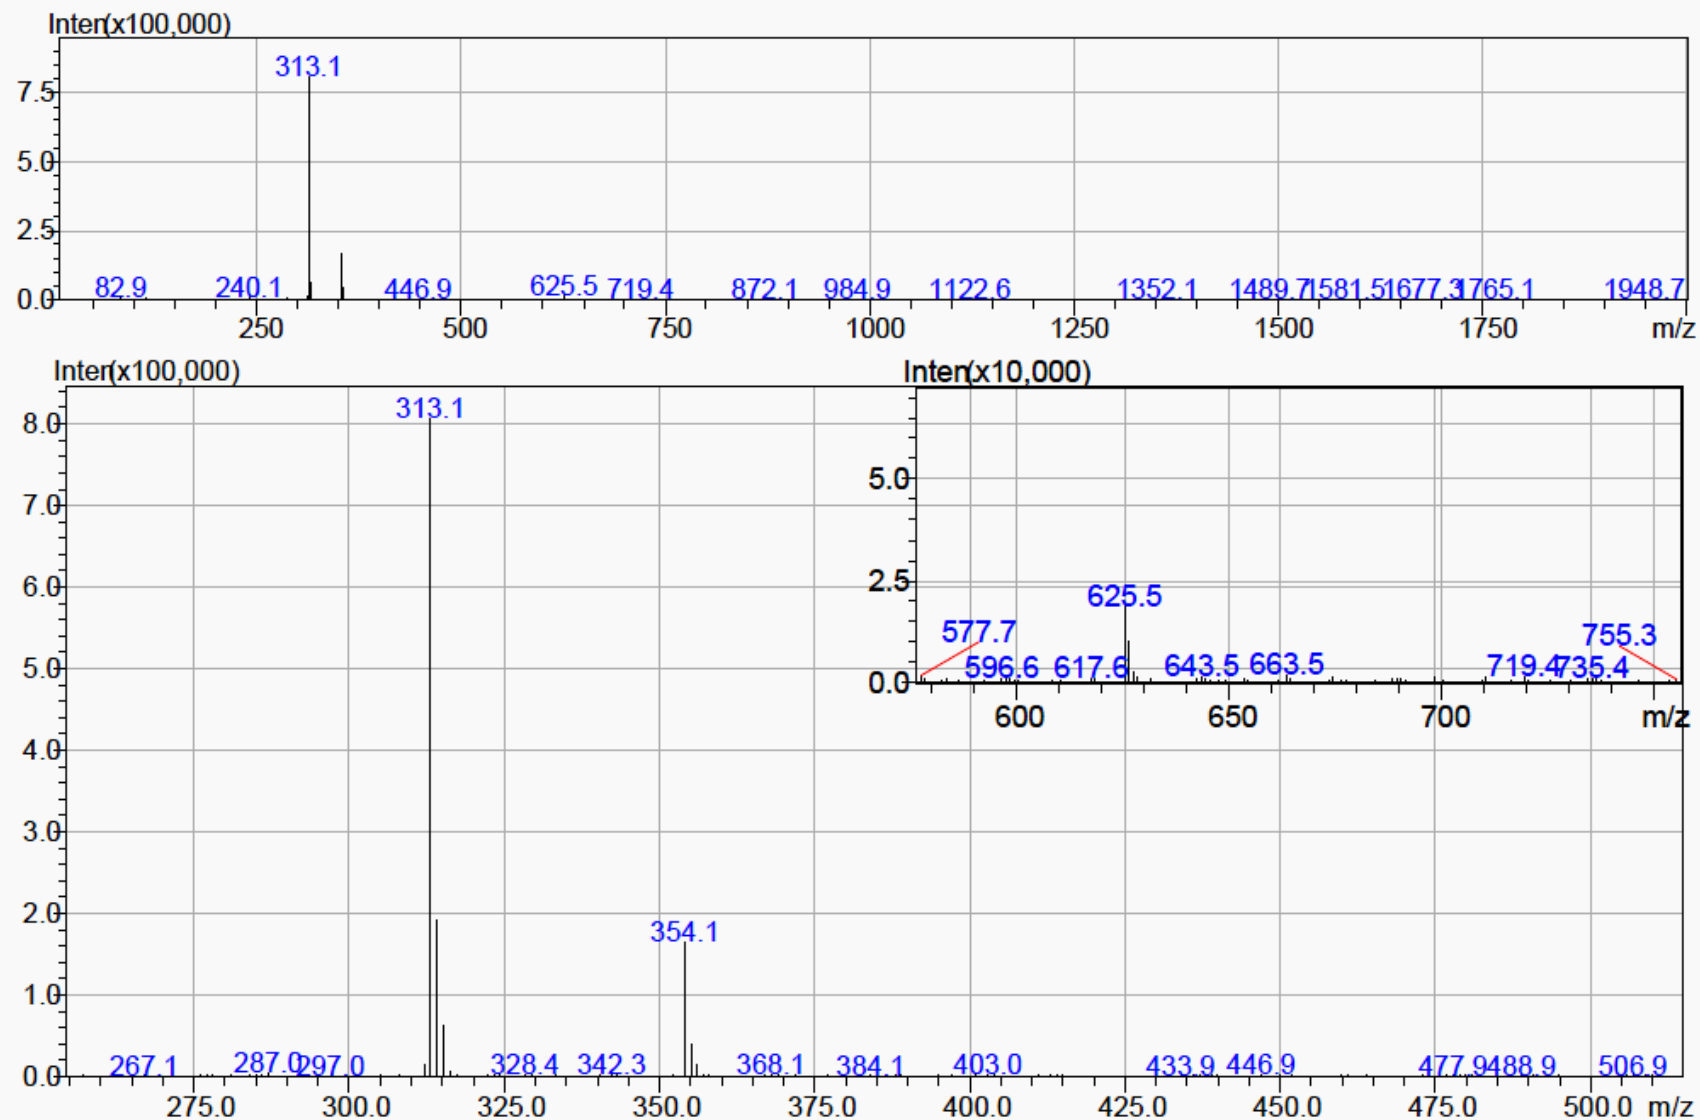

Fig. S19. Mass-spectrum of compound 11

MeCN/HOH 100/0, 0.1 ml/min

1 Scan(C+) Ret. Time : 5.600 min

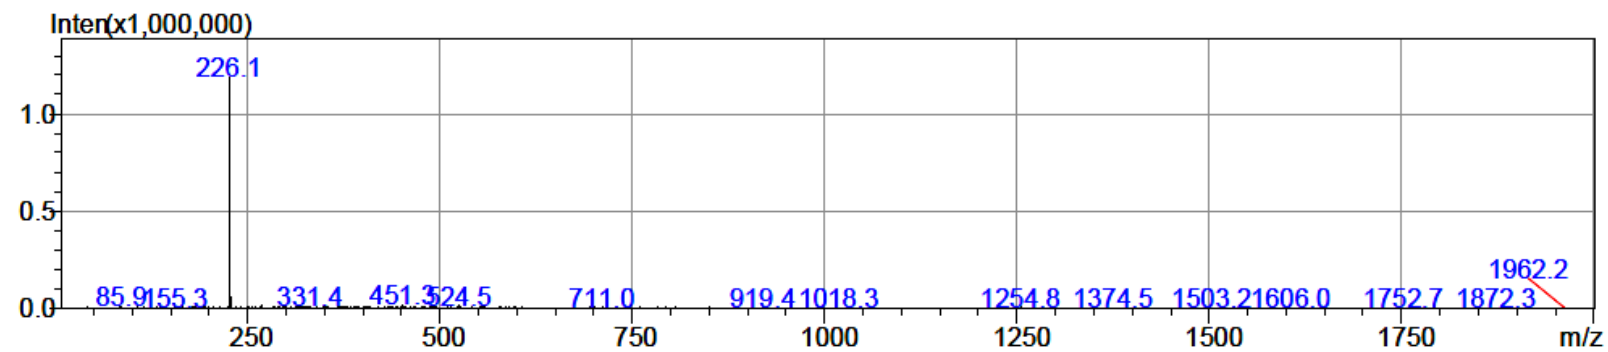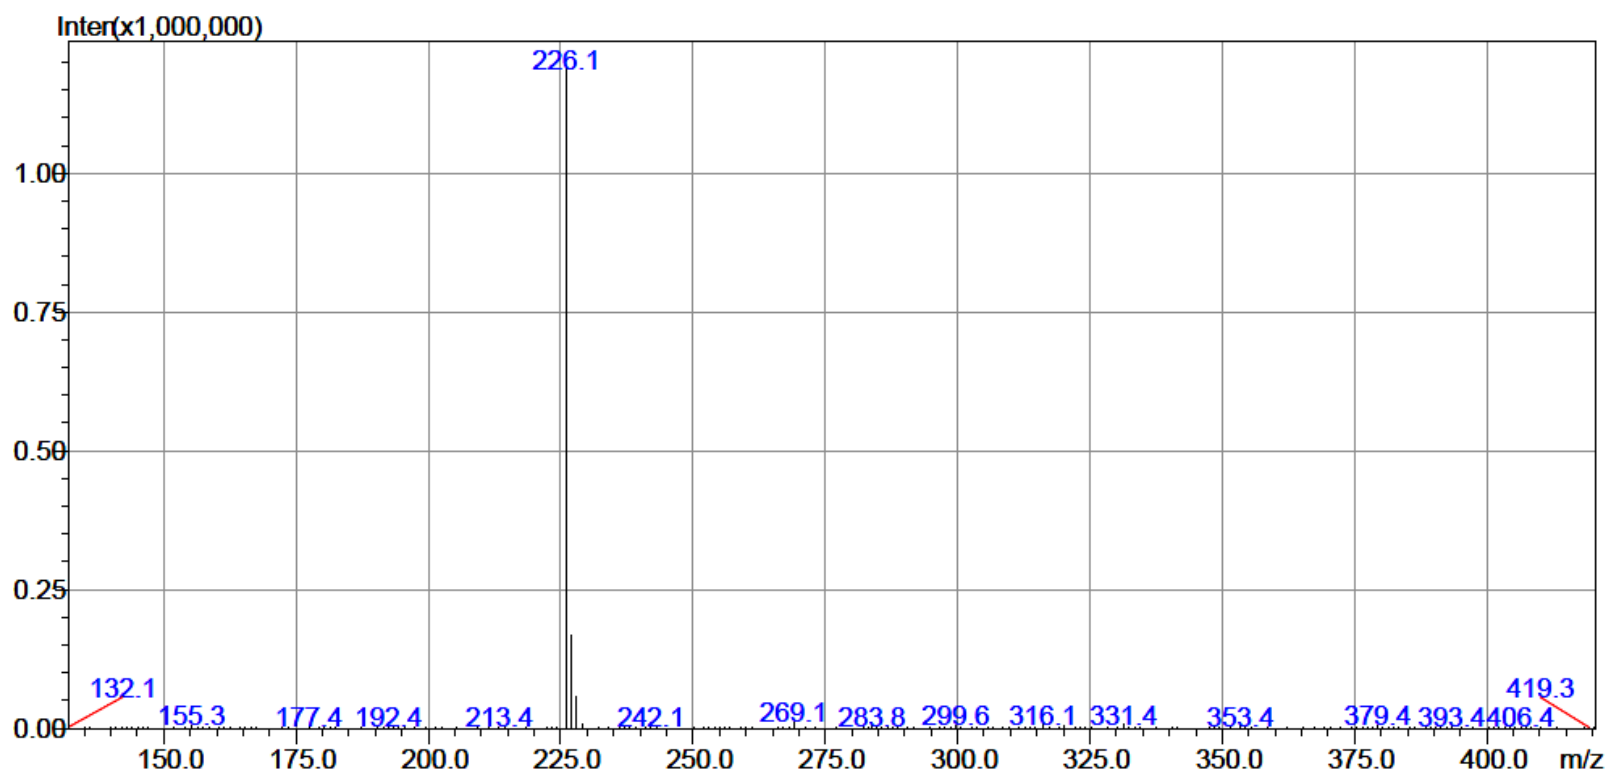

Fig. S20. Mass-spectrum of compound 12
